# Supplementary material
Source: PubMed Central journal article supplement (PMC6874500)
Supplement: EMS84966-supplement-Supplementary_Materials.pdf [file EMS84966-supplement-Supplementary_Materials.pdf]

## **Supplementary Materials**

Supplementary Text

Materials and Methods

Figs. S1 to S10

Tables S1 to S9

Caption for Movie S1

References (51–109) [Note: References 51-109 are only called out in Supplementary Materials]

## Supplementary Materials for

### Genomic and epidemiological monitoring of yellow fever virus transmission potential

Faria, N. R. <sup>1¶\*</sup>, Kraemer, M. U. G. <sup>1,2\*</sup>, Hill, S. C. <sup>1\*</sup>, Goes de Jesus, J. <sup>3\*</sup>, de Aguiar, R. S. <sup>4\*</sup>, Iani, F. C. M. <sup>5,6\*</sup>, Xavier, J. <sup>3</sup>, Quick, J. <sup>7</sup>, du Plessis, L. <sup>1</sup>, Dellicour, S. <sup>9</sup>, Thézé, J. <sup>1</sup>, Carvalho, R. D. O. <sup>8</sup>, Baele, G. <sup>9</sup>, Wu, C.-H. <sup>10</sup>, Silveira, P. P. <sup>4</sup>, Arruda, M. B. <sup>4</sup>, Pereira, M. A. <sup>5</sup>, Pereira, G. C. <sup>5</sup>, Lourenço, J. <sup>1</sup>, Obolski, U. <sup>1</sup>, Abade, L. <sup>1,11</sup>, Vasylyeva, T. I. <sup>1</sup>, Giovanetti, M. <sup>3</sup>, Yi, D. <sup>12</sup>, Weiss, D.J. <sup>13</sup>, Wint, G. R. W. <sup>1</sup>, Shearer, F. M. <sup>13</sup>, Funk, S. <sup>14</sup>, Nikolai, B. <sup>15,16</sup>, Fonseca, V. <sup>8,17</sup>, Adelino, T. E. R. <sup>5</sup>, Oliveira, M. A. A. <sup>5</sup>, Silva, M. V. F. <sup>5</sup>, Sacchetto, L. <sup>8</sup>, Figueiredo, P. O. <sup>8</sup>, Rezende, I. M. <sup>8</sup>, Mello, E. M. <sup>8</sup>, Said, R. F. C. <sup>18</sup>, Santos, D. A. <sup>18</sup>, Ferraz, M. L. <sup>18</sup>, Brito, M. G. <sup>18</sup>, Santana, L. F. <sup>18</sup>, Menezes, M. T. <sup>19</sup>, Brindeiro, R. M. <sup>19</sup>, Tanuri, A. <sup>19</sup>, dos Santos, F. C. P. <sup>20</sup>, Cunha, M. S. <sup>20</sup>, Nogueira, J. S. <sup>20</sup>, Rocco, I., M. <sup>20</sup>, da Costa, A. C. <sup>21</sup>, Komninakis, S. C. V. <sup>22</sup>, Azevedo, V. <sup>8</sup>, Chieppe, A. O. <sup>23</sup>, Araujo, E. S. M. <sup>6</sup>, Mendonça, M. C. L. <sup>6</sup>, dos Santos, C. C. <sup>6</sup>, dos Santos, C. D. <sup>6</sup>, Mares-Guia, A. M. <sup>6</sup>, Nogueira, R. M. R. <sup>6</sup>, Sequeira, P. C. <sup>6</sup>, Abreu, R. G. <sup>24</sup>, Garcia, M. H. O. <sup>24</sup>, Abreu, A. L. <sup>25</sup>, Okumoto, O. <sup>25</sup>, Kroon, E. G. <sup>8</sup>, de Albuquerque, C. F. C. <sup>26</sup>, Lewandowski, K. <sup>27</sup>, Pullan, S. T. <sup>27</sup>, Carroll, M. <sup>28</sup>, de Oliveira, T. <sup>17,29</sup>, Sabino, E. C. <sup>21</sup>, Souza, R. P. <sup>20</sup>, Suchard, M. A. <sup>30,31</sup>, Lemey, P. <sup>9</sup>, Trindade, G. S. <sup>8</sup>, Drumond, B. P. <sup>8</sup>, Filippis, A. M. B. <sup>6</sup>, Loman, N. J. <sup>7</sup>, Cauchemez, S. <sup>15,16\*</sup>, Alcantara, L. C. J. <sup>3\*¶</sup>, Pybus, O. G. <sup>1\*¶</sup>

correspondence to: nuno.faria@zoo.ox.ac.uk (N.R.F.); lalcan@bahia.fiocruz.br (L.C.J.A.); oliver.pybus@zoo.ox.ac.uk (O.G.P.)

#### This PDF file includes:

Supplementary Text  
Materials and Methods  
Figs. S1 to S10  
Tables S1 to S9  
Caption for Movie S1

#### Other Supplementary Materials for this manuscript includes the following:

Movie S1  
Nucleotide alignments, BEAST XML files, epidemiological data, available from the GitHub repository: <https://github.com/arbospread/YFV-monitoring>

## Supplementary Text

### Brief overview of YFV in Brazil and YFV urban outbreaks

In the Americas, the YFV jungle/sylvatic cycle involves virus transmission between jungle/sylvatic mosquitos and non-human primates (NHP). In contrast, an urban YFV transmission cycle (sometimes called the domestic cycle) involves virus transmission between humans by *Ae. aegypti* mosquitoes; a secondary role of *Ae. albopictus* in YFV urban epidemics remains controversial (22-24, 51, 52).

Several large urban YFV outbreaks have been reported in Brazil since the 17th century, in the states of Pernambuco (Recife, 1685), Bahia (1686-1692), Bahia (Salvador, 1849) and Rio de Janeiro (1849-1908) [reviewed in (14)]. After an absence of 20 years, YFV re-emerged in Rio de Janeiro (1928-1929) causing a recorded 738 cases and 478 deaths (14). This was the last large urban outbreak in the Americas. The last 3 suspected urban YFV cases were reported in Brazil in 1942, in the state of Acre, Sena Madureira municipality, in northern Brazil (15). In 1932, Soper et al. identified sylvatic YFV transmission in Vale do Canaã, Espírito Santo state, in southeast Brazil (53). Shortly thereafter, in 1937, Theiler & Smith developed the 17D YFV vaccine (54) and in the same year a field vaccine trial started in Brazil. In 1955 Brazil reported the elimination of the *Ae. aegypti* vector in the country through a national campaign using the insecticide dichloro-diphenyl-trichloroethane (DDT) (15). By 1970 *Ae. aegypti* had been eradicated from most of Latin America (55).

After an estimated 30 years, *Ae. aegypti* was re-introduced multiple times to Brazil (56) and the vector is now well-established in all municipalities of the country (17). Between 1950 to 2016 there were 1366 YFV cases in total across the country, linked to the sylvatic transmission cycle (**Fig. S1**).

Vectors involved in sylvatic YFV transmission in Brazil include mosquitos of the genera *Haemagogus* and *Sabethes*, especially *Hg. janthinomys*, *Hg. albomaculatus*, *Hg. leucocelaenus*, *Sa. Soperdi*, *Sa. chloropterus*, *Sa. Cyaneus*, and *Aedes serratus* (11, 57-60). Countrywide statistics from Brazil during 2000-2012 indicate that ~86% of sylvatic cases of YFV in humans occur in adult males. They acquire the infection in forested areas and typically have occupations such as agricultural workers, tourists, fishermen, students and truck drivers (19, 61). A high proportion of male YFV cases (76%) was observed in a large epidemic of sylvatic YFV in Peru in 1997 (62).

Urban yellow fever epidemics have been reported in several African countries and regions, including Nigeria-Lagos (1925-26), Ghana-Accra (1926-27 and 1937) and Gambia-Banjul (1937), Nigeria-Jos (1969), Angola-Luanda (1971), Nigeria-Azare et Bauchi (1979), Nigeria-Sud Ouest (1987), Angola-Luanda (1988), Nigeria-etat de Delta (1995), Nigeria-Kano (2000), Côte d'Ivoire-Abidjan (2001), Guinea-Conakry (2002), Dakar and Touba-Senegal (2002), Bob-Dioulasso-Burkina Faso (2004), and Luanda-Angola (2017) (62, 63). A large urban outbreak of YFV in western Nigeria in 1987-1988 exhibited a male:female case ratio of 1.4:1, with 71% of cases being <20 years old (29). However direct comparisons of YF epidemiological profiles between outbreaks in South America and Africa are not possible due to several factors including (i) strong heterogeneity in vaccination rates (4), (ii) different demographic profiles in each region, (iii) the presence of different YFV genotypes in each region (36, 64, 65) and (iv) the presence of other infections, such as hepatitis B, C, or E, that may confound case reporting (66).

In the Americas, evidence of urban YF transmission is more limited. Serology indicated a small YFV outbreak in the Department of Santa Cruz, Bolivia, in 1999 (67). However, of the 6 confirmed cases (all male), four had travelled outside the city. During 2008-2009, 28 human YFV cases in Paraguay were reported (28). Of these, 19 were notified in the departments of San Pedro and Caaguazú and were considered to be sylvatic cases (based on the travel history and occupation of infected patients). The remaining 9 cases occurred in an urban area of the Central Department, Municipio of San Lorenz, and lived <500m from each other: 4 were housewives, 4 were students, and 1 was a dependent. None had travelled during the two weeks prior to symptom onset. The average age of these nine individuals was 25 (range 11-39) and 44% (4/9) were male.

## Materials and Methods

### Description of epidemiological data from Minas Gerais, Brazil

The 853 municipalities in Minas Gerais are distributed among 28 regional health facilities (Gerências Regionais de Saúde). Local zoonotic surveillance units collected tissue samples from carcasses of NHPs, following the guidelines for epizootic surveillance of YFV (36). NHP samples were sent to Fundação Ezequiel Dias (FUNED), Flavivirus Reference Laboratory of the Brazilian Ministry of Health in Oswaldo Cruz Foundation of Rio de Janeiro, and Universidade Federal Minas Gerais for molecular diagnostics. For NHP samples, associated metadata (e.g. primate family, genus or species, date of capture, municipality of sample collection) were obtained directly from local teams or from the National Reportable Disease Information System - SINAN (Sistema de Informação de Agravos de Notificação; <http://portalsinan.saude.gov.br/>). To detect viral RNA in YFV suspected cases, post-mortem liver NHP samples were tested using YFV RT-qPCR.

For human cases, hospitals or health centers report cases and collect blood/serum samples or tissue samples (fatal cases only). For each tested case, metadata was retrieved from SINAN. Between Jan 2015 and Sep 2017, 2571 samples from patients residing in 212 municipalities of Minas Gerais (MG) with symptoms compatible with YFV infection were tested at (FUNED), located in Belo Horizonte, MG, southeast Brazil (**Fig. S2**), and the Flavivirus Reference Laboratory of the Brazilian Ministry of Health in Oswaldo Cruz Foundation of Rio de Janeiro, in Rio de Janeiro. During the same period, 9555 human samples from patients residing in 362 municipalities of MG were tested for CHIKV infection in the same laboratories (**Fig. S2**) following standard procedures (68). Although human and NHP cases are reported via different mechanisms, it is difficult to exclude the possibility that reporting variation among municipalities may play some role in the spatial association of cases. Following Pan American World Health Organization (PAHO) guidelines, YFV human samples were obtained  $\leq 6$  days after the onset of clinical symptoms, after which they were subjected to RT-qPCR. If samples were obtained  $>6$  days after onset of disease, serological confirmation of YFV through IgM detection was performed. Due to potential cross-reactivity of serological assays, a positive YF serological test performed 6 days after onset of symptoms can indicate one of (i) recent YF infection, (ii) past YF vaccination, or (iii) infection with other circulating flaviviruses, such as Zika virus or dengue virus (69). Sex, age, municipality of residence, date of sample collection, and date of onset of symptoms were available for human YFV cases, YFV(H).

From the cases tested in MG between Jan 2015 and October 2017, the following datasets were prepared. Note that the same patient may have been tested with different tests, so the sample size (N) given below equals the total number of individuals with at least one positive test, which may be less than the sum of the number of positive tests:

- **Dataset A:** YFV(H) cases confirmed either by RT-qPCR (n=159) or by virus isolation (n = 62) or by IgM (n=478) at FUNED (n=683);
- **Dataset B:** YFV(NHP) cases confirmed by RT-qPCR in liver tissue analysed at the UFMG (N=314);
- **Dataset C:** CHIKV confirmed by RT-qPCR (n=144) or by IgM (n=3609) at FUNED (N=3755; no virus isolation was performed for CHIKV).
- **Dataset D:** YFV(H) confirmed either by RT-qPCR (n=159) or by virus isolation (n=62) at FUNED (n=221);
- **Dataset E:** CHIKV confirmed by RT-qPCR at FUNED (n=144).

The geographic distributions of YFV(H), YFV(NHP) and CHIKV cases are shown in **Fig. 1D**, **Fig. 1E** and **Fig. S3**, respectively. Note that these maps correspond, respectively, to datasets A, B and C described above.

To assess the association between the time series of YFV(NHP) and YFV(H) cases, we computed pairwise cross correlations among datasets A, B, and C, correcting for time lag and assuming that each dataset followed a unimodal distribution across time that covered a single epidemic wave of YFV. The correlations and corresponding P-values are shown in **Table S1**. Note that the time series are compared at the state, not local, level, making the analysis comparison more robust to sampling variation among municipalities.

#### Model of age-sex distributions under urban and sylvatic transmission cycles

To investigate whether human YF cases result from an urban or sylvatic transmission cycle we examined the age-sex distribution of human YF cases in MG between Dec 2016 (the date of first confirmed human YFV RT-qPCR case) and October 2017 (see **Fig. 1**). We define the “urban cycle” as YFV transmission between individuals mediated by anthropophilic *Ae. aegypti* mosquitoes. This may occur in urban, peri-urban or rural settings (hence the term ‘domestic cycle’ is sometimes used instead). We developed two models to predict the age-sex distribution of YFV cases expected under an urban cycle. In *model M1*, we assume that exposure to YFV in the urban cycle is independent of sex and age, approximately equivalent to the situation observed during urban YF outbreaks in Paraguay (28) and Nigeria (29). We reconstructed the resulting age-sex distribution from the underlying population age pyramid in MG (70) and from vaccine coverage per birth cohort (4). The expected number of individuals of age  $a$  and sex  $s$  that are at risk of YFV infection is then:

$$S_1(a, s) = N(a, s).p_U(a, s) \quad (1)$$

where  $N(a, s)$  is the number of individuals of age  $a$  and sex  $s$  in the population and  $p_U(a, s)$  is the proportion of unvaccinated individuals in that group. We assume that the proportion of vaccinated individuals is independent of sex in a given birth cohort. The expected proportion of YFV cases that are of age  $a$  and sex  $s$  is therefore:

$$(2)$$

$$P_1(a, s) = \frac{S_1(a, s)}{\sum_{a', s'} S_1(a', s')}$$

In *model M2*, we assume that, under a scenario of urban cycle transmission, the risk of exposure to YFV for a susceptible individual would be proportional to that seen for CHIKV cases (**Fig. S4**).

Let  $C(a, s)$  denote the number of reported CHIKV cases of age  $a$  and sex  $s$ . For an individual of age  $a$  and sex  $s$ , the relative risk of being reported as a CHIKV case is defined as:

$$RR_{CHIK}(a, s) = \frac{C(a, s)}{N(a, s)} \quad (3)$$

Thus in model M2, the expected proportion of YFV cases that are of age  $a$  and sex  $s$  is:

$$P_2(a, s) = \frac{S_1(a, s) \cdot RR_{CHIK}(a, s)}{\sum_{a', s'} S_1(a', s') \cdot RR_{CHIK}(a', s')} \quad (4)$$

The age-sex distribution of dengue virus cases in Minas Gerais cannot be used as a proxy for that YFV in an urban cycle because, in areas where dengue has been circulating for years, the build-up of dengue immunity in the population will skew the age distribution of cases towards younger age groups. Further, three immunologically-distinct serotypes of dengue virus (1, 2 and 3) co-circulate in the region (71) but the serotypes of reported cases are not always known or tested. Additionally, it is not possible to use Zika case counts as a proxy because Zika virus molecular diagnoses were strongly biased towards women of gestational age, in accordance with Ministry of Health guidelines (72).

While we can propose simple and generic models to describe the expected age-sex distribution of cases in the YFV urban cycle, it is harder to predict what this distribution might look like in the sylvatic cycle because the propensity of individuals to travel to forested areas will likely depend on complex socio-economic and cultural factors that may exhibit substantial variation among regions, hence it is not feasible to construct a generic model of the age-sex distribution of YFV cases in the sylvatic cycle.

#### Estimating expected spatial distances to the source of YF infection

Many human YFV cases were reported in cities across the region and the travel history of most cases remains unknown. To assess the likelihood of a sylvatic transmission cycle scenario, in which most infections occur in forested areas, we calculate the average great circle distance between the place of residence of each human case and the nearest location with environmental conditions likely suitable for sylvatic transmission (73). We then compare this distance to that expected for typical (non-YFV infected) residents of Minas Gerais, estimated using high-resolution population datasets from 2015 (74). We used overall greenness of the environment [Enhanced Vegetation Index (EVI) (75)] to identify areas with environmental conditions suitable for sylvatic transmission. The EVI has been previously determined to be the best-fitting predictor of seasonal YFV transmission (76). Several thresholds of EVI for each municipality were considered: 0.33 (5%), 0.41 (50%), 0.46 (95%). Great-circle distances were calculated using the “`rdist.earth`” function in R (77). We also

calculated the distance to areas with known occurrences of positive non-human primates, again for both confirmed YF cases in humans and for typical residents of Minas Gerais.

#### Ethical statements for biological data

The project was supported by the Pan American World Health Organization (PAHO) and the Brazilian Ministry of Health as part of arboviral genomic surveillance efforts. Human samples were previously obtained for routine diagnostic purposes from persons visiting local clinics in Minas Gerais and Rio de Janeiro. Residual anonymized clinical diagnostic samples, with no or minimal risk to patients, were provided for research and surveillance purposes within the terms of Resolution 510/2016 of CONEP (Comissão Nacional de Ética em Pesquisa, Ministério da Saúde; National Ethical Committee for Research, Ministry of Health). We included 121 samples extracted at the Fundação Ezequiel Dias (FUNED), the main central public health laboratory in Minas Gerais (MG) (*sub-study I*). An additional 8 non-human primate (NHP) samples were extracted at the Universidade Federal de Minas Gerais (UFMG) and subsequently sent to FIOCRUZ Bahia for sequencing (**Table S2**). For the NHP samples from UFMG, authorization was obtained by the State Health Department of Minas Gerais and by the Ethics Animal Research Committee of Universidade Federal de Minas Gerais (License CEUA: 347/2017). Human samples were also processed at the Reference Centre for Arbovirus in Rio de Janeiro, the Laboratory of Flavivirus at FIOCRUZ Rio de Janeiro (*sub-study II*). Ethical approval for human samples was obtained from CEP/CAAE: 0026.0.009.000-07, with Institutional Review Board approval numbers 027/2007 and 1.920.256). Samples obtained from the Reference Centre for Arbovirus of São Paulo, Adolfo Lutz Institute (IAL) have been processed in agreement with routine surveillance activities from the Brazilian Ministry of Health and under the CEUA (Comitê de Ética de Uso de Animais em Pesquisa) registration number 02/2011.

#### Viral RNA isolation and sample processing

Human clinical samples included tissue and serum or plasma. In brief, viral RNA was extracted from 200 µL of clinical sample using QIAmp Viral RNA Minikit (Qiagen) according to the manufacturer's instructions but with several protocol changes. Tissue samples were first homogenised using a TissueLyser LT (Qiagen). A small piece of tissue (~2 mm diameter) was cut using a disposable scalpel and added to a 2 mL Eppendorf tube containing a 5 mm stainless steel bead (Qiagen). 560 µL AVL lysis buffer (Qiagen) was added to each tube and the sample was homogenised for 5 min at 50 Hz on a TissueLyser LT followed by a 10 min incubation at room temperature to lyse virions. Samples were centrifuged at 1,200g for 2 min to pellet cellular material, and 500 µL of supernatant was transferred to a new tube containing 500 µL of 100% EtOH. For serum or plasma samples, 200 µL of the sample was added to 560 µL of AVL lysis buffer (Qiagen) and left to incubate for 10 minutes before addition 560 µL of 100% EtOH. RNA extraction was subsequently completed on-site according the manufacturer's protocol for all sample types. To avoid contamination between samples due to the high number of virions, regular glove changes were conducted and parafilm was used to seal the gap between collection tubes and QIAamp Mini columns (Qiagen) during centrifugation. Batches always contained only primate or only human samples and a negative extraction control was processed with every batch. Human samples were linked to a record of clinical information such as date of onset of symptoms, date of sample collection, municipality, state of residence, age, sex, residence type and, when available, vaccine and travel history.

### Real-time quantitative PCR (sub-studies I to III)

YFV reverse transcription quantitative real-time PCR (RT-qPCR) was performed on 121 samples using the Superscript III Platinum One-Step qRT-PCR System (Invitrogen) on a StepOnePlus Real-Time PCR machine (Applied Biosystems). The conserved YFV 5' non-coding region was targeted using the primers YFall15F (5' to 3': GCTAATTGAGGTGYATTGGTCTGC), YFall103R (5' to 3': CTGCTAATCGCTCAAMGAACG) and the probe YFall41 (5' to 3': FAM-ATCGAGTTGCTAGGCAATAAACAC-BHQ), based on the previously described Domingo's assay (78). Thermocycler conditions consisted of reverse transcription at 45°C for 15 min, denaturation at 95 °C for 5 min, followed by 40 cycles of denaturation at 95 °C for 10s, and annealing and extension at 60°C for 40s. To check RNA isolation efficiency, we used RNase P as an endogenous positive control. Assays for RNase P used the primers RNaseP-F (5' to 3':AGATTTGGACCTGCGAGCG), RNaseP-R (GAGCGGCTGTCTCCACAAGT), and a probe (FAM-TTCTGACCTGAAGGCTCTGCGCG-BHQ1).

### Validation of the sequencing primer scheme for MinION

Two candidate sequencing primer schemes were designed using Primal Scheme (<http://primal.zibraproject.org>) to amplify 500 bp or 1000 bp overlapping amplicons (32) of the complete genome of the YFV South American genotype 1, based on previous reports (33), with an overlap length of 75 bp between each neighbouring pair of primers (**Table S4**). The scheme was validated at Public Heath England, UK. cDNA synthesis and multiplex PCR were conducted on RNA extracts from a cultured vaccine strain YFV 17D. PCR products were cleaned using 0.8x Ampure XP (Beckman Coulter) bead cleanups, quantified, and pooled. Libraries for the MinION were constructed using the ligation sequencing kit 1D (SQK-LSK108) and native barcoding kit (EXP-NBD103). The library was sequenced on an R9.4 flow cell (FLO-MIN106). Basecalled reads were aligned to a YFV reference genome using bwa (GenBank accession number: JF912190). Given that the regions overlap, alternate amplicons are amplified in two separate PCR reactions. These are pooled and barcoded together (in previous studies (32, 79) these pools were barcoded separately, but this reduces the number of samples per flowcell by half). Mapping the reads to the reference genome showed the scheme provided good coverage across most of the coding-region of the genome. 95% of the genome had a depth of at least 379 reads, and 70% of the genome had a depth of at least 1941 reads. Both the 500bp and 1000bp PCRs with 40 cycles of PCR were tested in May 2017 at Minas Gerais (FUNED) on 7 samples of previously extracted RNA. Following PCR, quantitated dsDNA concentrations were higher for the 500 bp scheme than for the 1000 bp scheme, and therefore this scheme was chosen for all following assays (<https://github.com/zibraproject/zika-pipeline/tree/master/schemes>).

### cDNA synthesis, library preparation and sequencing for MinION (sub-study D)

cDNA was reverse transcribed from viral RNA using the Protoscript II First Strand Sequencing kit (NEB) with random hexamer priming. Multiplex PCR was conducted using Q5 High Fidelity Hot-Start DNA Polymerase (New England Biolabs) and the 500bp sequencing primer scheme (**Table S4**). All samples were subjected to 32-40 cycles of PCR using the thermocycling conditions and reaction conditions described in Quick et al. (32). PCR products were purified using a 1x Ampure XP bead cleanup and concentrations were measured using a Qubit dsDNA High Sensitivity kit on a Qubit 3.0 fluorimeter



(ThermoFisher). Library preparation for the ONT MinION was conducted using Ligation Sequencing 1D (SQK-LSK108) and Native Barcoding kit (EXP-NBD103) according to the manufacturer's instructions, but with the changes detailed in (32). Amplified DNA and appropriate negative controls were sequenced in barcoded multiplexes of 6–12 samples per MinION run using FLO-MIN106 flow cells. Sequencing was performed without basecalling for 48 hours using MinKNOW. Consensus sequences for each barcoded sample were generated following previously published methods (32). Briefly, raw files were basecalled using Albacore, demultiplexed and trimmed using Porechop, and then mapped with *bwa* to a reference genome (GenBank Accession No. JF912190). Nanopolish variant calling was applied to the assembly to detect single nucleotide variants to the reference genome. Consensus sequences were generated; non-overlapped primer binding sites, and sites for which coverage was <20X were replaced with ambiguity code N. Sequencing statistics can be found in **Table S5**.

#### cDNA synthesis and sequencing using Ion Torrent (sub-study II)

cDNA synthesis was executed with SuperScript III Reverse Transcriptase (ThermoFisher Scientific) and random hexamers. Subsequently, YFV genome amplification was performed using Platinum Taq High Fidelity DNA Polymerase (ThermoFisher Scientific). PCR products were analyzed by electrophoresis gel and purified using PureLink Genomic DNA spin columns (ThermoFisher Scientific). YFV amplicons were quantified using a Qubit dsDNA High Sensitivity kit on the Qubit Fluorometric 2.0 (ThermoFisher Scientific). Sequencing libraries were prepared using 100ng of PCR products with an Ion Plus Fragment Library Kit (ThermoFisher Scientific), according to the manufacturer's instructions. For template amplification, emulsion PCR (emPCR) was performed using the Ion PGM Template OT2 kit and the Ion OneTouch 2 system (ThermoFisher Scientific). Ion Sphere particles (ISPs) were enriched using the Ion OneTouch ES (ThermoFisher Scientific). Enriched ISPs were sequenced using the Ion Torrent Personal Genome Machine Sequencer and the Ion PGM Hi-Q Sequencing kit (ThermoFisher Scientific), with the Ion 316 Chip. Data were collected for up to 8-9h. Reads were extracted, primer trimmed and mapped to a reference using Geneious R9 (9.1.7 version) (80). Briefly, primers were trimmed from each read (first 22 nt from 5' end). Reads were extracted based on amplicon size and coverage normalization was performed. Consensus genome sequences were generated by reference mapping to GenBank accession JF912190, and sites for which coverage was <3X were replaced with ambiguity code N. Sequencing statistics can be found in **Table S6**.

#### cDNA synthesis, library preparation and sequencing using Illumina (sub-study III)

Fourteen specimens were centrifuged at 20,000×g for 20 min and then filtered through a 0.45 µm filter (Merck Millipore, USA). The filtrates were treated with a mixture of nuclease enzymes to reduce background nucleic acids from the host cells and bacteria. RQ1 RNase-Free DNase (Promega Inc), DNase I (Zymo Research), Benzonase (Merck Millipore), RNase A (Zymo Research), RNase ONE (Promega Inc), Turbo DNase (Thermo Fisher) and 10X Turbo DNase buffer were added to the clarified supernatant and incubated at 37°C for 2h. Viral nucleic acids were extracted using a Maxwell 16 automated extractor (Promega Inc). Viral cDNA synthesis from extracted viral RNA/DNA was performed by using 50 pmol of a dodecamer of random primer in a reverse transcription reaction with AMV Reverse Transcriptase (Promega Inc) and RNasin Ribonuclease Inhibitor (Promega Inc). The 2nd strand cDNA synthesis was performed using DNA Polymerase I Large (Klenow) Fragment (Promega Inc), followed by the use of a Nextera XT Sample Preparation Kit (Illumina Inc) to

construct a DNA library with each sample identifiable using dual barcodes. For size selection, we used a Pippin Prep (Sage Science Inc) to select a 400 bp insert (range 200-600 bp). The library was deep-sequenced using the MiSeq Illumina platform with 2 x 300 bp paired ends. Paired-end reads of 2x300 bp generated by MiSeq were demultiplexed using the vendor software from Illumina. Demultiplexed Illumina reads were mapped on the JF912190 reference genome using bwa-mem program (81). The genome analysis toolkit (82) was used to perform variant calling and generate consensus sequences with a 3x minimum read depth coverage. Sequencing statistics can be found in **Table S7**.

#### Automated phylogenetic typing tool

We developed an tool that automatically classifies and accurately annotates YFV genome sequences, which is publicly available at [https://www.genomedetective.com/app/typingtool/yellowfevervirus\\_](https://www.genomedetective.com/app/typingtool/yellowfevervirus_)

To build this YFV typing tool, we prepared two reference datasets that include publicly available sequences, one with whole-genomes ( $n=34$ , length=10,235 bp) and another with envelope gene sequences ( $n=34$ , length=1,443 bp). The accession numbers for each reference sequence of each genotype are as follows; for South American genotype 1: JF912190, JF912187, JF912188, JF912189, JF912180, JF912182, JF912185, JF912179, JF912184, JF912183, JF912186; for South American genotype 2: TVP17388, JF912181; for the West African genotype: AF094612, JX898871, JX898872, AY640589, JX898875, JX898874, JX898873, AY572535, AY603338, JX898868, JX898870, JX898876, JX898878, JX898880, X898877, JX898869, YFU54798; and for the East African genotype: AY968064, AY968065, DQ235229, JN620362. To validate the reference datasets, phylogenetic trees were constructed using maximum likelihood (ML) with a general time-reversible model and among-site rate variation modeled using a discretized gamma distribution (GTR +  $\Gamma_4$ ), which was inferred as the best-fitting nucleotide substitution model in jModelTest (83). Trees were estimated using RAxML v8 (84) with 100 bootstrap replicates. All genotype clades are supported by bootstrap values of 100%, with the exception of the West-African genotype in the *env* tree, which is supported by a bootstrap score of 99%.

Classification of query sequences using the YFV subtyping tool involves two steps. The first step identifies the virus species using the basic local alignment search tool (85) that searches the RefSeq NCBI Reference sequence database that contains 7952 viruses reference genomes (86). The virus species is identified if the alignment score  $>400$ , which is the sum of identities minus gaps and mismatches. In addition, the tool also creates a codon alignment and identifies polymorphic sites and genetic diversity in the alignment, and aligns the query sequence to the NC\_002031 curated reference sequence (87).

The second step involves the reconstruction of a phylogenetic tree with a reference dataset using neighbour-joining (**Fig. S5**). Statistical support for phylogenetic clustering of the query strain with the pre-defined reference genotypes using 1,000 bootstrap replicates. A query sequence is assigned to a particular genotype if clustering is supported by a bootstrap score  $>70\%$ . The YFV typing tool accepts up to 2,000 sequences per submission and analyses each of sequence independently. At the end of the analysis, a phylogenetic tree is created that displays all query sequences and the reference dataset. A formatted report, estimated phylogenetic tree, and alignments can all be downloaded in multiple formats by the user.

#### Curation of whole-genome sequence datasets

We screened the GenBank database for published complete YFV genome sequences sampled worldwide using an in-house shell script. Subgenomic gene sequences from vector-borne flaviviruses typically contain insufficient genetic variation for reliable phylodynamic analysis on the time-scale of individual epidemics [e.g. (43, 88, 89)]. Therefore we retrieved all publicly available YFV sequences (n=756) from GenBank on 12<sup>th</sup> June 2018 and retained only complete or near complete YFV genomes (>8000 nt; n=200) (90). Sequences were collected from the Caribbean (Trinidad), East Africa (Ethiopia, Uganda and Sudan), Central Africa (Angola), East Asia (China), West Africa (Senegal, Ivory Coast, Ghana, Nigeria and Guinea-Bissau), and South America (Bolivia, Venezuela and Brazil). We then removed i) vaccine associated sequences (except the 17DD vaccine and Asibi strain, accession numbers: DQ100292 and AY640589), ii) sequences from patents, iii) duplicate entries, and iv) unpublished sequences from the Brazilian outbreak. Location and date of collection were retrieved from the original GenBank entry or from original publications. After curation, the “complete dataset” (n=125) contained complete or near complete YFV genomes sampled from 1927 to 2017. Sequences were aligned using MAFFT v.7 (91). Maximum likelihood (ML) phylogenetic trees were estimated using RAxML (84) under a GTR +  $\Gamma_4$  nucleotide substitution model, as described previously. ML trees were estimated from i) the “complete dataset” described above (n=125) (**Fig. S6A**), ii) the “SA1 dataset”, a subset of the complete dataset containing only South American genotype 1 (SA1) sequences (n=86) (**Fig. S6B**), and the iii) the “outbreak dataset”, a subset of the SA1 dataset containing sequences only from the Brazilian outbreak (n=65) (**Fig. S6C**). For each of these three phylogenies, we conducted root-to-tip regressions of sequence sampling date against genetic divergence (92) (**Figs. S6A-C**). A preliminary analysis identified 7 anomalous sequences with low genome coverage (<26%), which may represent potential contaminants or mislabelled sequences (92) and were therefore excluded from subsequent analyses. All alignments were screened for recombination using the Phi-test available in SplitsTree v.4 (93); the null hypothesis of the absence of recombination could not be rejected ( $P < 0.05$ ) and lack of recombination was confirmed using the RDP4 package (94). The *outbreak dataset* comprises 65 genome isolates, 62 of which were generated by this study, 2 of which were published in (33) and 1 published in (95) (**Fig. S6C** and **Table S2**).

#### Bayesian skygrid with epidemiological covariates

Time-scaled phylogenetic trees were reconstructed using the Bayesian phylogenetic inference framework available in BEAST v1.8.4 (96). We used a probabilistic approach that combined sequence substitution over an unknown tree, calibrated to a real time scale using a molecular clock model. We used the HKY +  $\Gamma_4$  nucleotide substitution model and a relaxed molecular clock model, with an underlying lognormal distribution of branch rates (97).

For the molecular clock model, we assumed that the outbreak clade exhibited a different clock rate to ancestral paraphyletic lineages, as observed in previous epidemics (98) and therefore we used a fixed local clock model (27) on the SA1 dataset; **Fig. S6B**). We also computed a Bayesian skygrid model (99) using the outbreak dataset alone (**Fig. S6C**), for which we specified 36 grids (i.e. the approximate number of epidemiological weeks spanned by the duration of the phylogeny). Further, we ran a Bayesian skygrid-based generalized linear model (40) with a streamlined prior specification in which effective population size through time is associated with a single covariate, chosen probabilistically from a set of possible covariates, while also accounting for phylogenetic uncertainty. In this analysis we investigated the following set of 3 covariates: i) log-linear YFV(H) case counts (dataset A), ii) log-linear YFV(NHP) case counts (dataset B) and iii) log-linear CHIKV human case

counts (dataset C). Specifically, for each grid point (epidemiological week) we include the log-transformed and standardized number of cases as described in the above section entitled “Description of epidemiological data from Minas Gerais, Brazil”. The association of each particular covariate with the effective population size dynamics of the outbreak is summarised by a coefficient and an inclusion probability (**Table S8**).

Distributions of the outbreak TMRCA obtained without and with covariates are shown in main text **Fig. 3c** (distributions a and b, respectively). Further, a comparison of the TMRCA estimates with and without YFV case count covariates are shown in **Fig. S7**.

### Structured coalescent analyses

Viral lineage transitions among hosts were inferred using a structured coalescent model, as implemented in the MultiTypeTree v6.3.0 package (41) for BEAST v2.4.7 (100). The analysis was performed on the “*outbreak dataset*” only (see **Fig. S6**). The structured coalescent model also estimates time-scaled phylogenetic trees and state transition histories. It assumes a constant effective population size for each deme (i.e. human vs non-human host states, in this study) and asymmetric transition rates between demes. As in the other analyses above, we used an uncorrelated relaxed molecular clock model with a lognormal distribution prior on the branch rate parameters (97) and a HKY+ $\Gamma_4$  nucleotide substitution model. Default priors were used for the nucleotide substitution model. A lognormal prior was placed on the molecular clock rate parameter, with mean equal to 0.001 substitutions per site per year (in real space) and standard deviation set to 1.

A lognormal prior with mean 0 and standard deviation 4 was used for the effective population sizes of demes and transition rates between demes (=host species states). To ensure that the phylogenetic timescale is well informed we placed a normally distributed prior with mean 0.751 years before the present (and standard deviation 0.18) on the time of the most recent common ancestor (TMRCA) of the tree. When estimating transition rates between host states, two independent runs of 200 million steps were computed, sampling parameters every 20,000 steps. The two chains were combined with LogCombiner, discarding 10% of each chain as burn-in and subsampling only half of the remaining states. Tracer v1.6.0 (<http://tree.bio.ed.ac.uk/software/tracer/>) was used to check the MCMC analysis for convergence. A maximum clade credibility tree with annotated branches was then generated in TreeAnnotator (**Fig. 4A**; the same tree with detailed taxa information is shown in **Fig. S8**). To recover the number host-switching events through time we counted the number of transitions between demes (host states) across monthly intervals for each tree in the posterior set of structured coalescent trees (migration histories). This count and its 95% HPD interval are shown in **Fig. 4C**.

To test sensitivity to the TMRCA prior used, the analysis was repeated (i) without a prior on the TMRCA and (ii) using a normally distributed prior with mean 0.731 years before the present and standard deviation 0.18, which corresponds to the TMRCA inferred under a standard skygrid model with covariates (see **Fig. 3C**). The inferred posterior distributions of the transition rates between human and NHP host states are shown in **Fig. S9**, where it can be seen that the TMRCA prior does not significantly affect the estimate transition rate dynamics. We also verified that this is the case for the migration histories (data not shown). In addition, the rate of host-transition events from NHP to human - our key result - always clearly deviates from the prior, whereas the reverse rate (from human to NHP) recovers the prior.

### Phylogeographic inference in continuous space

Bayesian continuous phylogeographic analyses were performed on the “*outbreak dataset*” only using the skygrid with covariates as the coalescent tree prior (40). We first inferred the best fitting continuous diffusion process by performing (log) marginal likelihood estimation using generalized stepping-stone sampling (101) on a range of relaxed random walk models, as well as the time-homogeneous Brownian motion process (**Table S9**). Details of the stepping stone sampling approach were as follows: after an initial posterior exploration of 10 million iterations, we collected 1000 samples from each of the 51 power distributions, distributed according to a Beta(0.3,1.0) distribution and sampling at every 1000<sup>th</sup> iteration. The log marginal likelihood estimates were highly consistent between independent runs in BEAST1.8.4 (102).

All the relaxed random walk models strongly outperformed the homogenous Brownian diffusion model. A model with Cauchy distributed diffusion rate variation among branches yielded the highest Bayes Factor (BF) against the homogenous diffusion model, indicating among-branch heterogeneity in branch velocity. The Cauchy model is most strongly preferred among all the relaxed random walk models (**Table S9**).

The Cauchy-distributed phylogeographic model selected above was then used to characterise the outbreak’s spatio-temporal epidemic history (44). Posterior distributions under the Cauchy models were obtained using Markov chain Monte Carlo (MCMC) sampling as implemented in BEAST v 1.8.4 (96). The BEAGLE library v2.1.2 was used to accelerate computation (103). MCMC chains were run in triplicate for 250 million generations, sampling every 50,000 steps. MCMC performance was inspected for convergence and for sufficient sampling using Tracer v.1.6.

To summarise virus diffusion over time and space, 1000 post-burn-in phylogenies sampled at regular intervals from the posterior distribution were obtained. The branches of these phylogenies were extracted as vectors, each having start and end spatial coordinates, and start and end dates (i.e. branch duration) in decimal units (43). The R package “seraphim” was used to estimate statistics of spatial dissemination, such as dispersal velocity, diffusion coefficients, and evolution of the maximal wavefront distance from epidemic origin (104, 105), as well as generating monthly graphical representations of the inferred spatio-temporal spread process (**Movie S1**) using the “spreadGraphic” function (106).

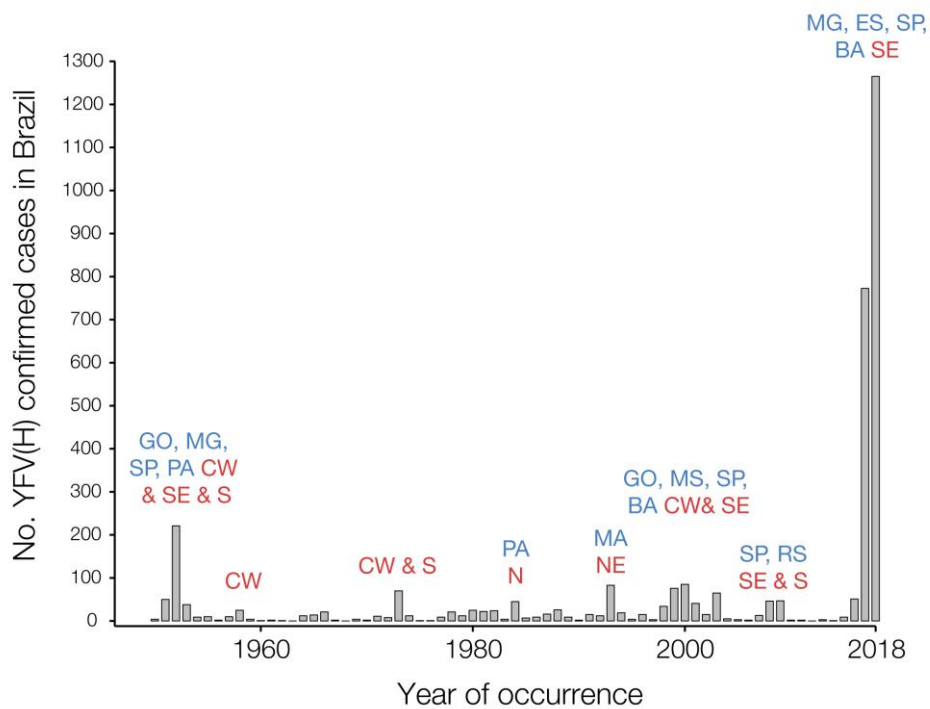

**Fig. S1.**

**Number of YF sylvatic cases in Brazil between 1950 and 2018.** Data from 1950 to 1980 are from (107); data from 1980 to 2015 are from Brazilian Ministry of Health (MoH) reports (35); data under “2017” are from the Brazilian MoH reports from 1<sup>st</sup> Dec 2016 to 1<sup>st</sup> July 2017 (18); data under “2018” are from 1<sup>st</sup> July 2017 to 16/05/2018 (109). Federal states (in blue): GO=Goiás, MG=Minas Gerais, SP=São Paulo, PA=Pará, MA=Maranhão, BA=Bahia, MS=Mato Grosso do Sul, RS=Rio Grande do Sul. Regions (in red): CW=Centre-West, SE=South-east, S=South, N=North, S=South.

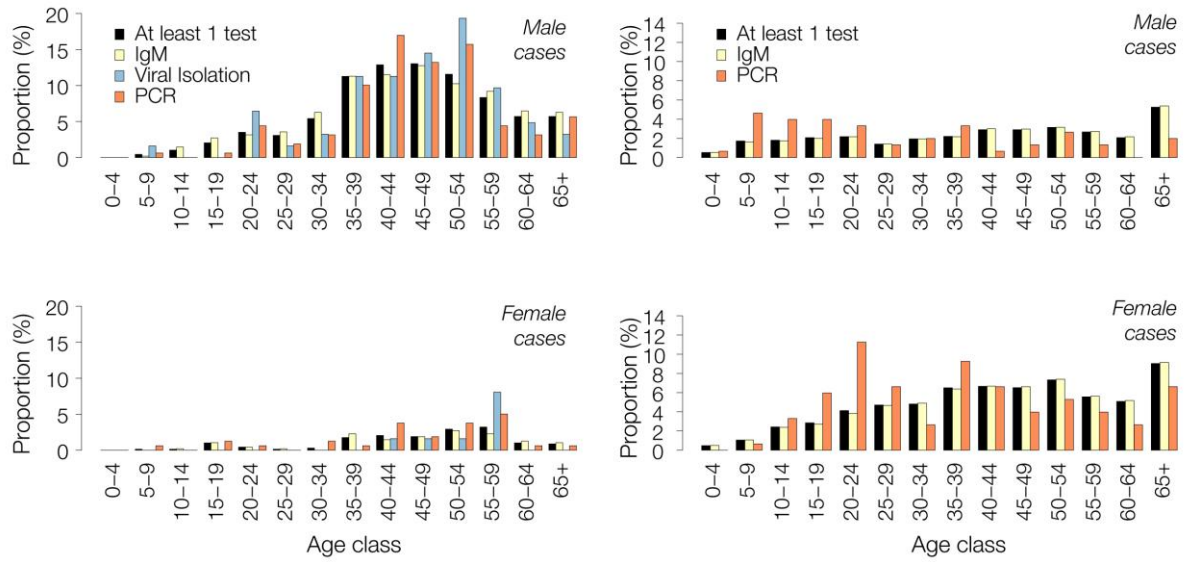

**Fig. S2.**

**Sensitivity of diagnostics for human YFV (left) and CHIKV (right) samples in Minas Gerais.** The proportion of samples positive for at least one test (black bars) in each age- and sex-class is shown, together with the proportion of positives for each test separately (IgM=yellow bars, viral isolation=blue bars, RT-qPCR=red bars).

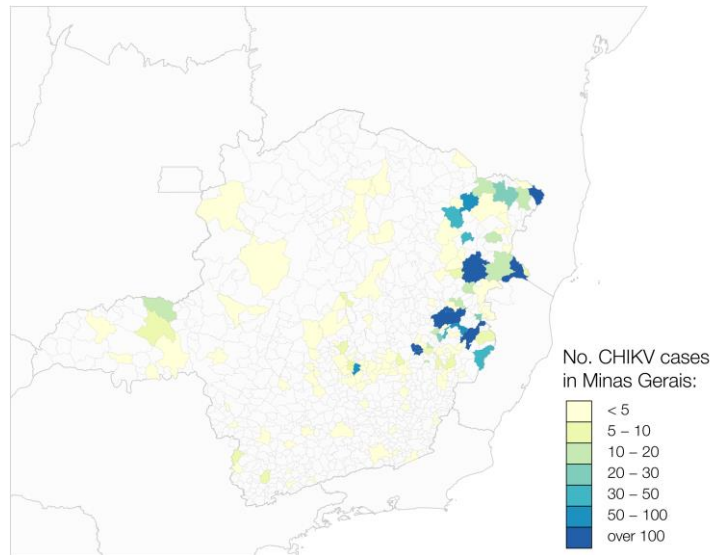

**Fig. S3.**  
**Geographic distribution of CHIK cases in Minas Gerais.** The figure shows cases confirmed by serology, RT-qPCR, or virus isolation in Minas Gerais from Jan 2015 to October 2017 (corresponding to dataset C).



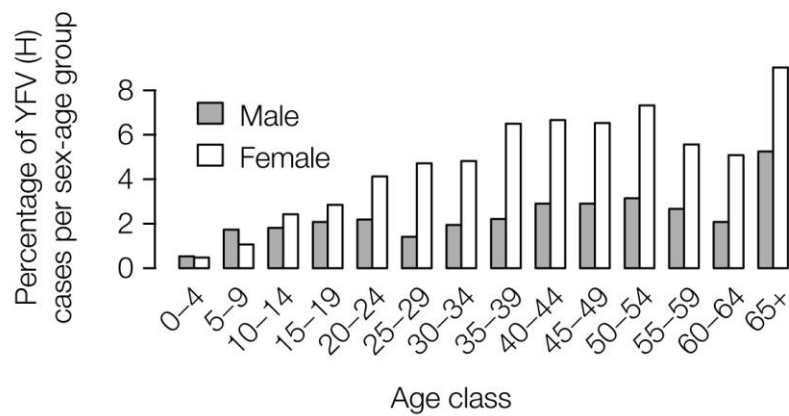

**Fig. S4.**

**Age-sex distribution of reported CHIKV cases in Minas Gerais.** The y-axis shows the percentage of CHIV cases belonging to each age- and sex-class that were confirmed by at least one diagnostic test in Minas Gerais, between Jan 2015 and October 2017 (dataset C).

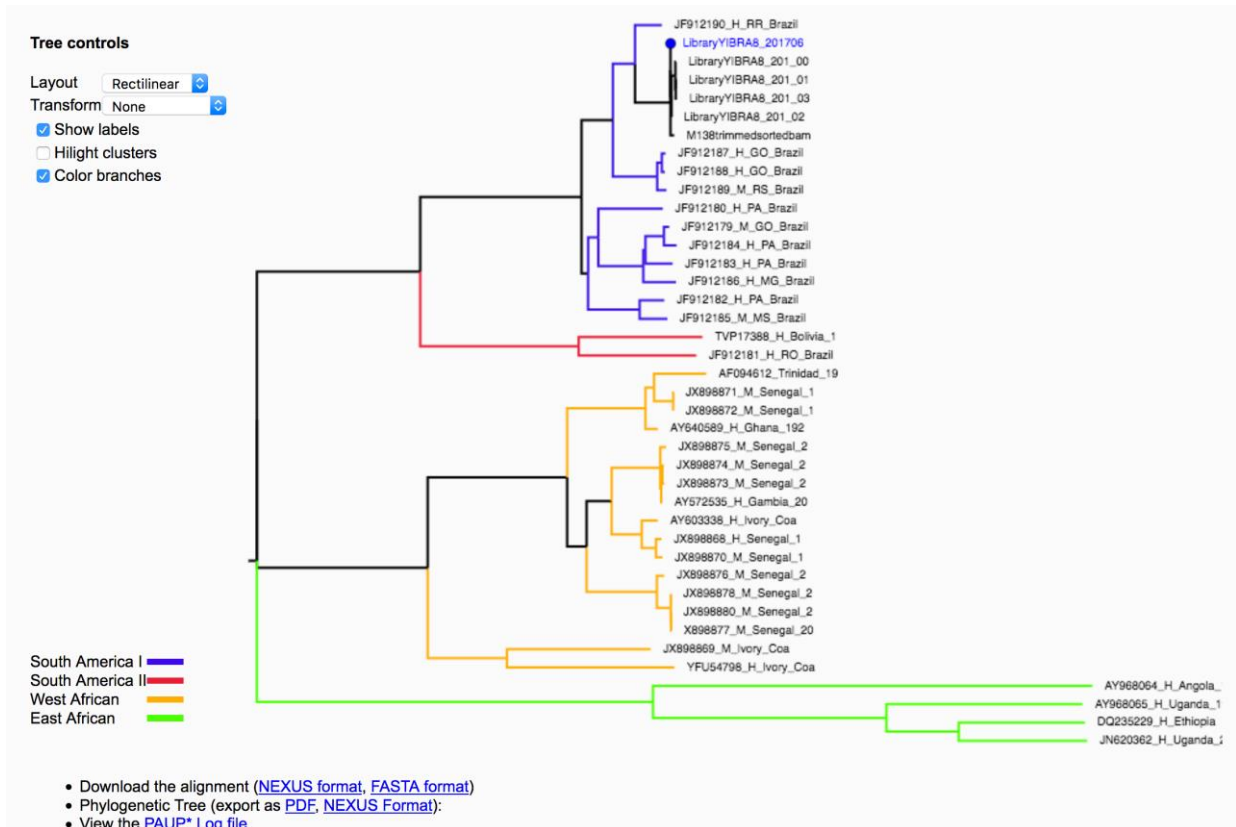

**Fig. S5.**

**Illustration of the output of the online YFV classification tool.** The figure shows the ML phylogeny of 6 target sequences analyzed by the tool. The output also provides a link to genome coverage and a more detailed report. The reference dataset is colored according to genotype.

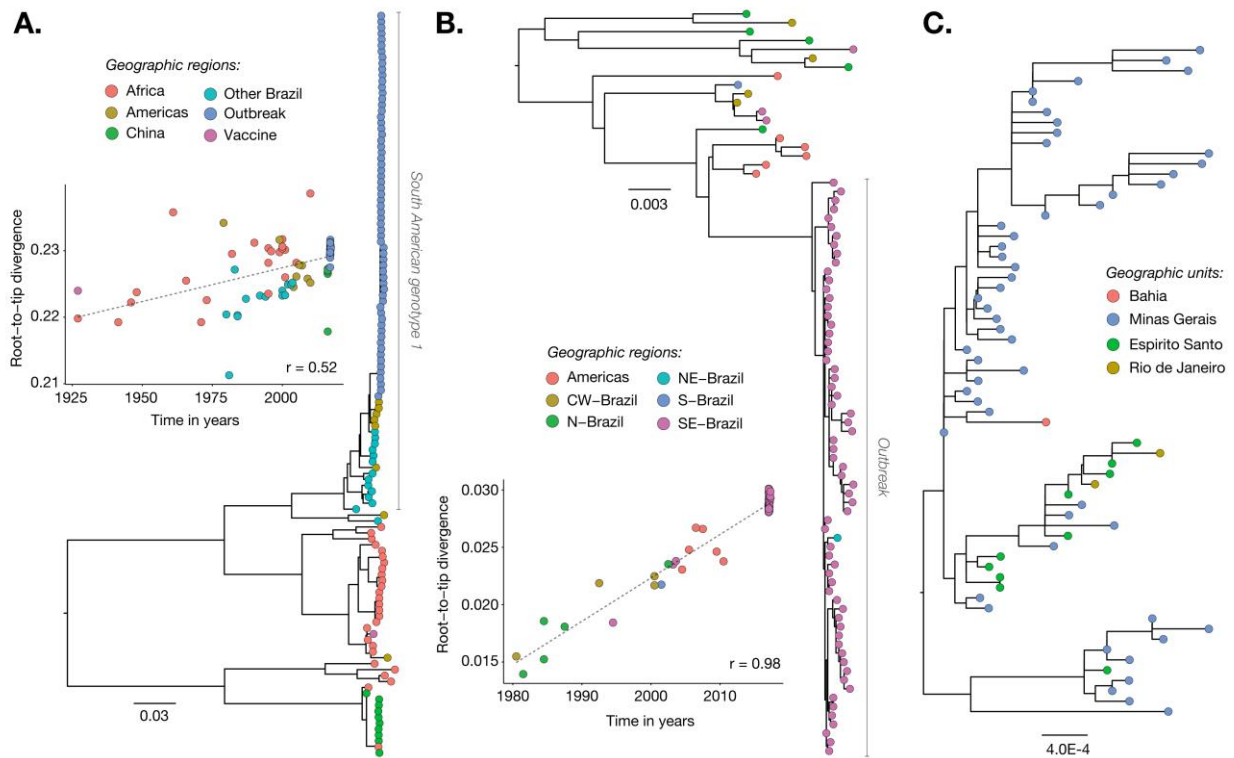

**Fig. S6.**

**Maximum likelihood (ML) phylogenies and temporal signal of YFV near-complete genome sequence datasets.** (A) The “complete dataset” (n=125). The figure shows the ML phylogeny for this alignment and its corresponding temporal signal (regression between sampling dates and genetic divergence). Branches are in nucleotide substitutions per site (scale bar). Tips are coloured according to geographic region of sample collection. The position of the SA1 genotype is shown to the right of the tree. (B) The “SA1 dataset” (n=86) that contains South American genotype 1 sequences only. The position of the outbreak clade is shown to the right of the tree. See panel A for further explanation. (C) The “outbreak dataset” (n=65). The corresponding regression analysis for this tree is provided in **Fig. 3**. See panel A for further explanation.

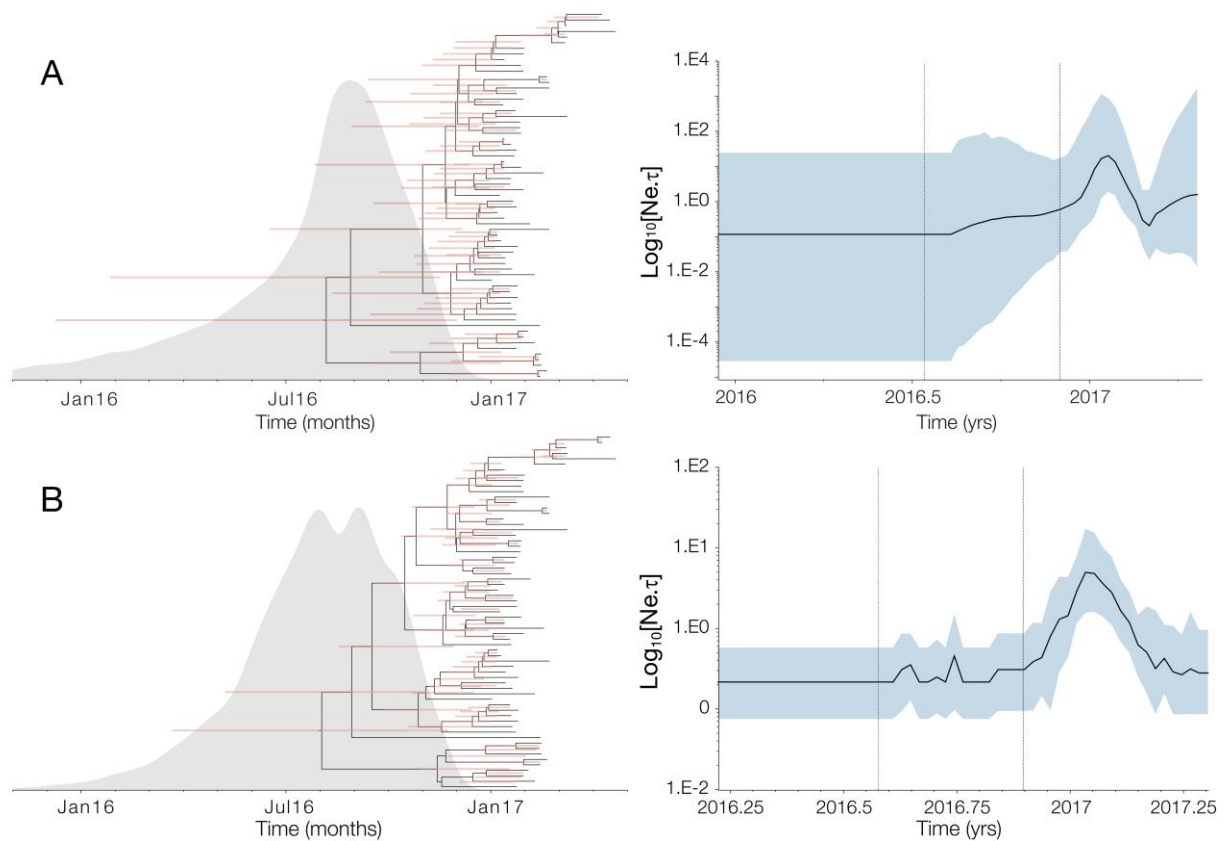

**Fig. S7.**

**Combining virus phylogeny and epidemic time series.** The left hand column shows maximum clade credibility trees (MCCs) generated in BEAST, together with their corresponding posterior distributions of the time of most recent common ancestor (TMRCA; grey) of the outbreak clade. Thin horizontal red bars indicate uncertainty in estimates of divergence times of internal nodes in each tree. The right hand column shows the corresponding Bayesian skygrid effective population size estimate. Black dashed line on the left = median estimate, black dashed line on the right = lower 95% highest posterior density (HPD) credible interval TMRCA estimate, and blue shaded area = 95% HPD credible interval. The top row (A) shows the results obtained using the standard skygrid model whilst the bottom row (B) shows the results obtained using skygrid model with covariates (B). Addition of the epidemiological time series data in (B) reduces the statistical uncertainty of the estimated TMRCA parameter by ~30%.

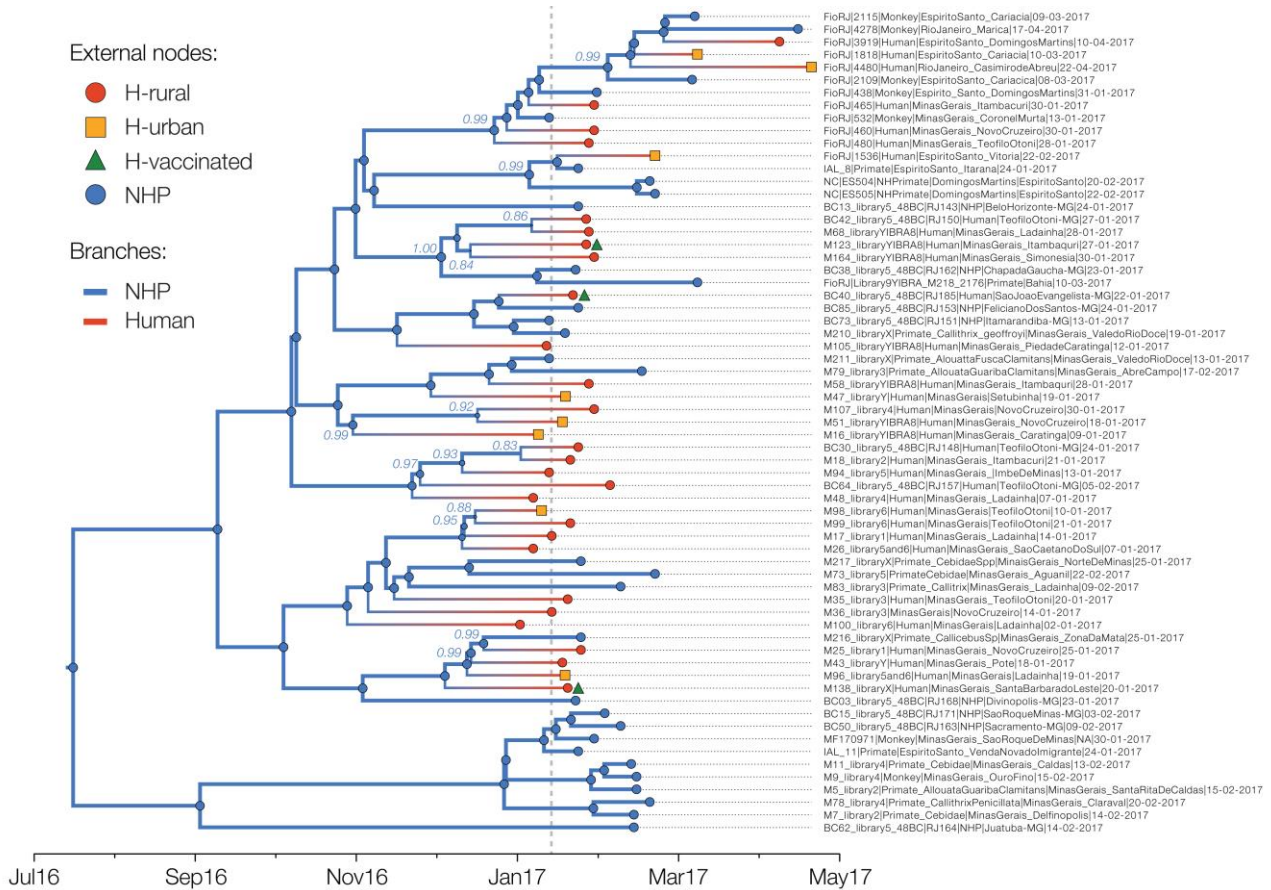

**Fig. S8.**

**Typed maximum clade credibility tree (corresponding to Fig. 4A).** The node labels indicate the posterior probability of the most likely host state for each internal node, inferred by the MultiTypeTree package (41). This representation does not include information on individual transition events between host states.

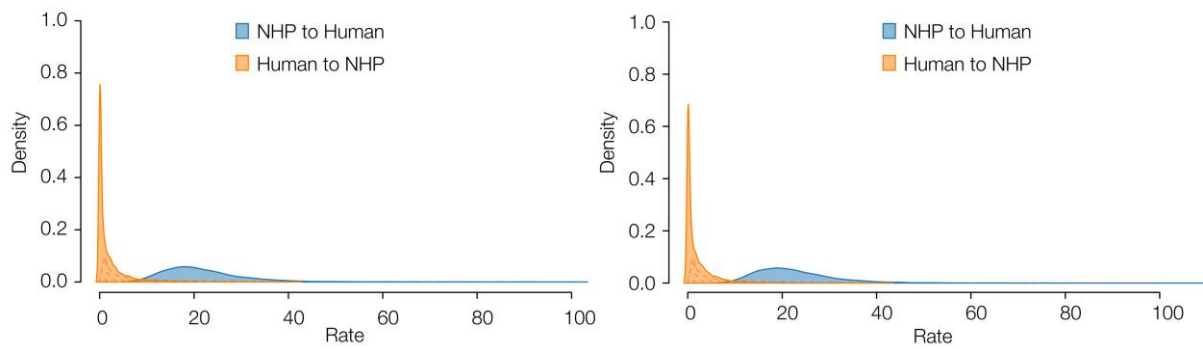

**Fig. S9.**

**Estimated posterior distributions of host state transition rates of the structured coalescent model under different priors.** From left to right, (i) using no prior on the TMRCA, and (ii) using a normal distribution with mean 0.73 years before the present and standard deviation of 0.18. The prior distribution used for the migration rates is shaded with dashed red lines.

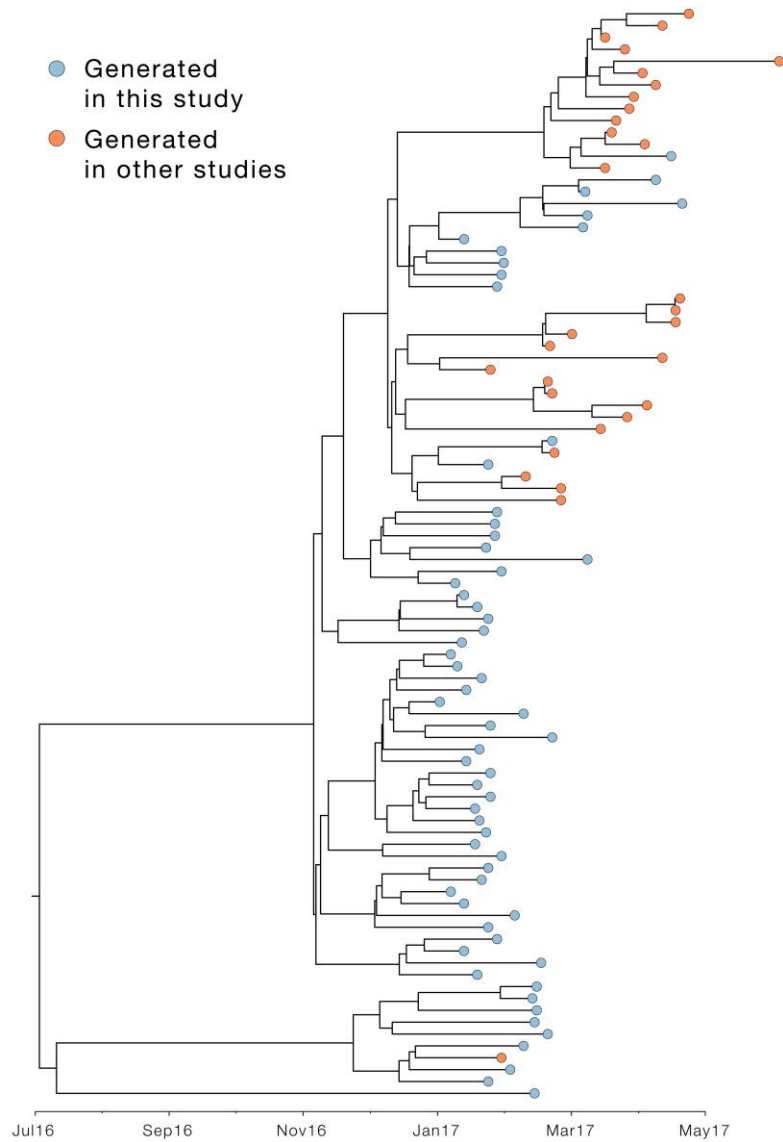

**Fig. S10.**

**Molecular clock phylogeny of the YFV epidemic in Brazil.** This tree includes sequences published in studies of the secondary epidemic. Blue taxa = generated by this study; orange taxa = generated in two separate studies of the secondary epidemic wave of YFV in Brazil (34, 109). Tree was estimated in BEAST v1.8.4 (96) using a HKY +  $\Gamma_4$  nucleotide substitution model and a relaxed molecular clock model, with an underlying lognormal distribution of branch rates (97).

**Table S1.**

**Time-series cross correlation analysis.** A, B and C correspond to the datasets A, B and C described in the text. Period = the time frame during which the comparison is made. The dataset in brackets is fixed during that period, while the other dataset is shifted temporally to correct for potential lag.  $p$ -value = the  $p$ -value of the correlation between the two “auto-correlated” series, accounting for the time-lag. Time lag = the lag between the two series, estimated to the nearest day via linear interpolation. Similar results were obtained when datasets D and B, D and C, and B and E were compared (data not shown).

| <b>Comparison</b> | <b>A vs B</b>                   | <b>A vs C</b>                   | <b>B vs C</b>                   |
|-------------------|---------------------------------|---------------------------------|---------------------------------|
| Period            | 1 Aug 2016 to<br>1 Oct 2017 (A) | 1 Aug 2016 to<br>1 Oct 2017 (A) | 1 Aug 2016 to<br>1 Oct 2017 (A) |
| $P$ -value        | <0.0001                         | <0.0001                         | <0.0001                         |
| Cross-correlation | 0.971                           | 0.757                           | 0.725                           |
| Time lag          | B is 4 days<br>ahead of A       | C is 62 days<br>behind A        | C is 64 days<br>behind B        |



**Table S2.**

**Laboratories involved in YFV genome sequencing.** H=Human, NHP=Non-human primate, MG = Minas Gerais, BA=Bahia, RJ=Rio Janeiro, ES=Espírito Santo.

| <b>Institution, State</b> | <b>Sample collection</b> | <b>Sequencing Platform</b> |
|---------------------------|--------------------------|----------------------------|
| FUNED, MG                 | MG                       | MinION                     |
| FIOCRUZ, BA               | MG, BA                   | MinION                     |
| FIOCRUZ, RJ               | MG, ES, RJ               | Ion Torrent™               |
| IAL, SP                   | ES                       | MiSeq                      |

**Table S3.**

Epidemiological data associated with each isolate processed/sequenced in this study. ID=Project identifier; Lab=Laboratory where samples were processed/sequenced; Host=Host species; State: MG=Minas Gerais, BA=Bahia; ES=Espirito Santo; RJ=Rio de Janeiro; Municipality=municipality of residence (unless stated otherwise). Date=Date of sample collection; Ct=RT-qPCR Cycle threshold value. “-”=not available. NHP=non-human primate of unknown species. \**Alouatta spp.* suspected. <sup>1</sup>=Patient M26 was a resident of São Caetano do Sul, São Paulo, whose symptoms began on 30<sup>th</sup> December 2016. Travel history suggests that M26’s infection occurred in Itambacuri municipality, neighboring Teófilo Otóni municipality, in Minas Gerais. <sup>2</sup>= Patient M123 was from São Paulo and visited Itambacuri, Minas Gerais. The patient reported receiving a vaccination, but no vaccination date was available. <sup>3</sup>=Patient M138 was vaccinated in Jan 2017 and developed symptoms 3 days later. <sup>4</sup>=Patient RJ185 was vaccinated in Jan 2017, 4 days before sample collection.

| ID  | Lab   | Sample | Host            | State | Municipality        | Date       | Ct | Sex | Age | Residence          |
|-----|-------|--------|-----------------|-------|---------------------|------------|----|-----|-----|--------------------|
| M5  | FUNED | Liver  | <i>Alouatta</i> | MG    | Sta. Rita de Caldas | 15/02/2017 | 11 | -   | -   | -                  |
| M7  | FUNED | Tissue | <i>Cebidae</i>  | MG    | Delfinópolis        | 14/02/2017 | 6  | -   | -   | -                  |
| M9  | FUNED | Tissue | <i>Alouatta</i> | MG    | Ouro Fino           | 15/02/2017 | 11 | -   | -   | -                  |
| M11 | FUNED | Tissue | <i>Cebidae</i>  | MG    | Caldas              | 13/02/2017 | 6  | -   | -   | -                  |
| M16 | FUNED | Liver  | Human           | MG    | Caratinga           | 09/01/2017 | 17 | M   | 43  | Urban              |
| M17 | FUNED | Liver  | Human           | MG    | Ladainha            | 14/01/2017 | 12 | M   | 49  | Rural              |
| M18 | FUNED | Liver  | Human           | MG    | Itambacuri          | 21/01/2017 | 15 | M   | 52  | Rural              |
| M25 | FUNED | Liver  | Human           | MG    | Novo Cruzeiro       | 25/01/2017 | 13 | M   | 62  | Rural              |
| M26 | FUNED | Liver  | Human           | MG    | Itambacuri          | 07/01/2017 | 15 | M   | 62  | Rural <sup>1</sup> |
| M35 | FUNED | Liver  | Human           | MG    | Teófilo Otóni       | 20/01/2017 | 21 | M   | 45  | Rural              |
| M36 | FUNED | Liver  | Human           | MG    | Novo Cruzeiro       | 14/01/2017 | 16 | F   | 55  | Rural              |
| M43 | FUNED | Liver  | Human           | MG    | Pote                | 18/01/2017 | 13 | M   | 43  | Rural              |
| M47 | FUNED | Liver  | Human           | MG    | Setubinha           | 19/01/2017 | 12 | M   | 40  | Urban              |
| M48 | FUNED | Liver  | Human           | MG    | Ladainha            | 07/01/2017 | 17 | M   | 52  | Rural              |
| M51 | FUNED | Liver  | Human           | MG    | Novo Cruzeiro       | 18/01/2017 | 18 | M   | 46  | Urban              |
| M58 | FUNED | Liver  | Human           | MG    | Itambacuri          | 28/01/2017 | 22 | M   | 53  | Rural              |
| M68 | FUNED | Liver  | Human           | MG    | Ladainha            | 28/01/2017 | 20 | F   | 55  | Rural              |
| M73 | FUNED | Liver  | <i>Cebidae</i>  | MG    | Aguanil             | 22/02/2017 | 14 | -   | -   | Urban              |

|      |           |       |                   |    |                   |                |    |   |       |                    |
|------|-----------|-------|-------------------|----|-------------------|----------------|----|---|-------|--------------------|
| M78  | FUNE<br>D | Liver | <i>Callithrix</i> | MG | Claraval          | 20/02/201<br>7 | 12 | - | -     | Rural              |
| M79  | FUNE<br>D | Liver | <i>Alouatta</i>   | MG | Abre Campo        | 17/02/201<br>7 | 11 | - | -     | Rural              |
| M83  | FUNE<br>D | Liver | <i>Callithrix</i> | MG | Ladainha          | 09/02/201<br>7 | 12 | M | Adult | -                  |
| M94  | FUNE<br>D | Liver | Human             | MG | Imbe de Minas     | 13/01/201<br>7 | 14 | M | 38    | Rural              |
| M96  | FUNE<br>D | Liver | Human             | MG | Ladainha          | 19/01/201<br>7 | 19 | M | 56    | Urban              |
| M98  | FUNE<br>D | Liver | Human             | MG | Teófilo Otóni     | 10/01/201<br>7 | 15 | M | 72    | Urban              |
| M99  | FUNE<br>D | Liver | Human             | MG | Teófilo Otóni     | 21/01/201<br>7 | 10 | M | 58    | Rural              |
| M100 | FUNE<br>D | Liver | Human             | MG | Ladainha          | 02/01/201<br>7 | 14 | M | 43    | Rural              |
| M105 | FUNE<br>D | Liver | Human             | MG | Pie. Caratinga    | 12/01/201<br>7 | 17 | M | 33    | Rural              |
| M107 | FUNE<br>D | Liver | Human             | MG | Novo Cruzeiro     | 30/01/201<br>7 | 9  | M | 35    | Rural              |
| M123 | FUNE<br>D | Serum | Human             | MG | Itambacuri        | 27/01/201<br>7 | 18 | F | 47    | Rural <sup>2</sup> |
| M138 | FUNE<br>D | Serum | Human             | MG | St. Barbara Leste | 20/01/201<br>7 | 15 | M | 50    | Rural <sup>3</sup> |
| M164 | FUNE<br>D | Serum | Human             | MG | Simonesia         | 30/01/201<br>7 | 32 | F | 0     | -                  |
| M210 | UFMG      | Liver | <i>Callithrix</i> | MG | Sabinópolis       | 19/01/201<br>7 | 12 | F | -     | -                  |
| M211 | UFMG      | Liver | <i>Alouatta</i>   | MG | José Raydan       | 13/01/201<br>7 | 9  | F | -     | -                  |
| M216 | UFMG      | Liver | <i>Callicebus</i> | MG | Luisburgo         | 25/01/201<br>7 | 14 | F | -     | -                  |
| M217 | UFMG      | Liver | <i>Cebidae</i>    | MG | Chapada Gaúcha    | 25/01/201<br>7 | 11 | M | -     | -                  |
| M225 | FioCruz   | Serum | Human             | MG | -                 | 15/03/200<br>3 | -  | - | -     | -                  |
| M226 | FioCruz   | Serum | Human             | MG | -                 | 15/08/200<br>3 | -  | - | -     | -                  |
| M218 | FioCruz   | -     | NHP               | BA | Cordeiros         | 10/03/201<br>7 | -  | - | -     | -                  |
| 438  | FioCruz   | blood | NHP               | ES | Domingos Martins  | 31/01/201<br>7 | 19 | - | -     | -                  |
| 460  | FioCruz   | Liver | Human             | MG | Novo Cruzeiro     | 30/01/201<br>7 | 16 | M | 35    | Rural              |
| 465  | FioCruz   | Liver | Human             | MG | Itambacuri        | 30/01/201<br>7 | 17 | M | 35    | Rural              |
| 480  | FioCruz   | Liver | Human             | MG | Teófilo Otóni     | 28/01/201<br>7 | 13 | F | 47    | Rural              |
| 532  | FioCruz   | Liver | <i>Alouatta</i>   | MG | Coronel Murta     | 13/01/201<br>7 | 8  | F | Adult | -                  |
| 1536 | FioCruz   | serum | Human             | ES | Vitória           | 22/02/201<br>7 | 11 | M | 31    | Urban              |
| 1818 | FioCruz   | serum | Human             | ES | Cariacica         | 10/03/201<br>7 | 19 | M | 65    | Urban              |

|       |         |        |                   |    |                     |            |    |   |    |                    |
|-------|---------|--------|-------------------|----|---------------------|------------|----|---|----|--------------------|
| 2109  | FioCruz | Liver  | <i>Alouatta</i>   | ES | Cariacica           | 08/03/2017 | 7  | - | -  | -                  |
| 2115  | FioCruz | Liver  | <i>Callithrix</i> | ES | Cariacica           | 09/03/2017 | 11 | - | -  | -                  |
| 3919  | FioCruz | serum  | Human             | ES | Domingos Martins    | 10/04/2017 | 14 | M | 45 | Rural              |
| 4278  | FioCruz | Liver  | <i>Alouatta</i>   | RJ | Maricá              | 17/04/2017 | 11 | M | 5  |                    |
| 4480  | FioCruz | plasma | Human             | RJ | Casimiro de Abreu   | 22/04/2017 | 19 | M | 47 | Urban              |
| 8     | IAL     | Liver  | NHP *             | ES | Itarana             | 24/01/2017 | 12 | - | -  | -                  |
| 11    | IAL     | Liver  | NHP *             | ES | Venda N. Imigrante  | 24/01/2017 | 13 | - | -  | -                  |
| RJ143 | FioCruz | Liver  | <i>Callithrix</i> | MG | José Raydan         | 24/01/2017 | 10 | - | 1  | -                  |
| RJ148 | FioCruz | Liver  | Human             | MG | Teófilo Otóni       | 24/01/2017 | 18 | M | 44 | Rural              |
| RJ150 | FioCruz | Liver  | Human             | MG | Teófilo Otóni       | 27/01/2017 | 18 | M | 46 | Rural              |
| RJ151 | FioCruz | Liver  | NHP *             | MG | Itamarandiba        | 13/01/2017 | 9  | - | 1  | -                  |
| RJ153 | FioCruz | Liver  | <i>Callithrix</i> | MG | Felício dos Santos  | 24/01/2017 | 9  | - | 1  | -                  |
| RJ157 | FioCruz | Liver  | Human             | MG | Teófilo Otóni       | 05/02/2017 | 17 | M | 35 | Rural              |
| RJ162 | FioCruz | Liver  | <i>Callithrix</i> | MG | Chapada Gaúcha      | 03/02/2017 | 9  | - | -  | -                  |
| RJ163 | FioCruz | Liver  | <i>Callithrix</i> | MG | Sacramento          | 09/02/2017 | 13 | - | -  | -                  |
| RJ164 | FioCruz | Liver  | NHP *             | MG | Juatuba             | 14/02/2017 | 11 | - | -  | -                  |
| RJ168 | FioCruz | Spleen | <i>Alouatta</i>   | MG | Bom Jesus do Galho  | 23/01/2017 | 18 | - | -  | -                  |
| RJ171 | FioCruz | Liver  | NHP *             | MG | S. Roque de Minas   | 03/02/2017 | 9  | - | -  | -                  |
| RJ185 | FioCruz | Serum  | Human             | MG | S. João Evangelista | 22/01/2017 | 14 | M | 39 | Rural <sup>4</sup> |

**Table S4.**Primer sequences ( $n=54$ ) for the YFV-500bp MinION sequencing scheme.

|                         |                           |
|-------------------------|---------------------------|
| >YFV_500_1_LEFT         | >YFV_500_15_LEFT          |
| GTCTGGTCGTAAAGCTCAGGGA  | ATCATCATGGACGAAGCACATTTTT |
| >YFV_500_1_RIGHT        | >YFV_500_15_RIGHT         |
| TGGGGCAGTTGTATTCCATGGA  | CCTTCATCCACAAGCACAGGTT    |
| >YFV_500_2_LEFT         | >YFV_500_16_LEFT          |
| TCTGAGGACCTTGGGAAAACCT  | TCTTGGCCACTGACATAGCTGA    |
| >YFV_500_2_RIGHT        | >YFV_500_16_RIGHT         |
| ACCCCCTCAATGAAATCCCTGT  | CTCAAAGCACCACTTTTCGGTCA   |
| >YFV_500_3_LEFT         | >YFV_500_17_LEFT          |
| AACATGACGCAACGAGTTGTCA  | ATGACCAGAGGAGAGTCTTCCG    |
| >YFV_500_3_RIGHT        | >YFV_500_17_RIGHT         |
| TGTTCCAATTCTCCTGCTTGGC  | GGCCAGAACAAACAGCATGACT    |
| >YFV_500_4_LEFT         | >YFV_500_18_LEFT          |
| TGCCAAGTTTACCTGTGCCAAA  | TGCTCTTGCACTCTGAGGAAGG    |
| >YFV_500_4_RIGHT        | >YFV_500_18_RIGHT         |
| CTTTTGTGACTCGCATTGCACC  | GCAGCTCCTGGTTTCAAGTCAA    |
| >YFV_500_5_LEFT         | >YFV_500_19_LEFT          |
| TGGAATTTGAGCCTCCACATGC  | AGGCATGCTGGAAAAGACTAAGG   |
| >YFV_500_5_RIGHT        | >YFV_500_19_RIGHT         |
| TCCTTGTGCCACTGGTAAGTCA  | TTCTTCTCATAGAGGGCAGGCA    |
| >YFV_500_6_LEFT         | >YFV_500_20_LEFT          |
| GCCTCCACCAATGATGATGAAGT | GCACAGAGGAGGGTGTTCATG     |
| >YFV_500_6_RIGHT        | >YFV_500_20_RIGHT         |
| ACACTTGAGCTCTCTCTTGCCA  | CACGGTCCACTTCCACAATGTC    |
| >YFV_500_7_LEFT         | >YFV_500_21_LEFT          |
| ACAATGTCCATGAGCATGATCCT | AAGATGAAGACTGGACGCAGGG    |
| >YFV_500_7_RIGHT        | >YFV_500_21_RIGHT         |
| ACGGACACTCTTTCCTGGACTT  | GATGATGGGGACGACTCTCCAA    |
| >YFV_500_8_LEFT         | >YFV_500_22_LEFT          |
| CAATACGGCTGGAAGACTTGGG  | TGGGGTGGAAACATCACCTT      |
| >YFV_500_8_RIGHT        | >YFV_500_22_RIGHT         |
| GGCAAGCTTCCCTTTTCACCTC  | TCTGTTTCCACACTGCGTGTTC    |
| >YFV_500_9_LEFT         | >YFV_500_23_LEFT          |
| TCAATTGGGGGTCCAGTTAGCT  | CTGTGAATCAAACATCCCGCCT    |
| >YFV_500_9_RIGHT        | >YFV_500_23_RIGHT         |
| TCATGAAAGTGCAGTCCAACCG  | GGTTCTTTTCTCTGGCCAGGTG    |
| >YFV_500_10_LEFT        | >YFV_500_24_LEFT          |
| GTTGGAGGCATGGTGCTTCTAG  | TGACACCAGAGCAAAGGATCCA    |
| >YFV_500_10_RIGHT       | >YFV_500_24_RIGHT         |
| GGGGTATGGTCTTCTGCATGGA  | CGCATAGAATCCACCACCCTCT    |
| >YFV_500_11_LEFT        | >YFV_500_25_LEFT          |
| TGACAATGGCTGAGGTGAGACT  | TGAATGAGGACCACTGGGCATC    |
| >YFV_500_11_RIGHT       | >YFV_500_25_RIGHT         |
| ATCCCATGGCACCTTCTCTTCA  | ATCTCCACTCACTGCCATCCTC    |
| >YFV_500_12_LEFT        | >YFV_500_26_LEFT          |
| TGGGAAGAGGAAGCTGAGATCAG | TGATACACCACCAGCATGTCCA    |
| >YFV_500_12_RIGHT       | >YFV_500_26_RIGHT         |
| TCTCCATCCCATCTACCCTCCA  | CTTCCCATGAACAGACCACGTG    |
| >YFV_500_13_LEFT        | >YFV_500_27_LEFT          |
| CGAGGGGCCTTTCTCGTTAGAA  | CAAGATGAGCTGGTTGGCAGAG    |
| >YFV_500_13_RIGHT       | >YFV_500_27_RIGHT         |
| GTCTTGTTTTCCCAGCTCCAGG  | CTGCAGATCAGCATCCACAGAG    |
| >YFV_500_14_LEFT        |                           |
| AACTGAGGTGAAAGAGGAGGGG  |                           |
| >YFV_500_14_RIGHT       |                           |
| GGGGTGGCAGTCATCAAGATTG  |                           |

**Table S5.**

Statistics for the sequences generated using the MinION sequencer.

| Sample | Host  | Ct | Total Reads | Mapped Reads | Bases Covered >10x | Bases Covered >=25x | % Reference Covered |
|--------|-------|----|-------------|--------------|--------------------|---------------------|---------------------|
| M5     | NHP   | 11 | 35357       | 35319        | 10216              | 10216               | 99                  |
| M7     | NHP   | 6  | 29103       | 29073        | 10216              | 10216               | 99                  |
| M9     | NHP   | 11 | 16838       | 16781        | 10216              | 10216               | 99                  |
| M11    | NHP   | 6  | 13499       | 13416        | 10216              | 10216               | 99                  |
| M16    | Human | 17 | 45277       | 44706        | 10216              | 9946                | 97                  |
| M17    | Human | 12 | 12984       | 12974        | 10216              | 10216               | 99                  |
| M18    | Human | 15 | 30246       | 27268        | 10204              | 9370                | 91                  |
| M25    | Human | 13 | 9477        | 9463         | 10216              | 10214               | 99                  |
| M26    | Human | 15 | 116601      | 111963       | 10216              | 10204               | 99                  |
| M35    | Human | 21 | 35936       | 28670        | 9946               | 9673                | 94                  |
| M36    | Human | 16 | 24004       | 22049        | 10216              | 9358                | 91                  |
| M43    | Human | 13 | 4858        | 4836         | 10216              | 9365                | 91                  |
| M47    | Human | 12 | 130596      | 130176       | 10216              | 10213               | 99                  |
| M48    | Human | 17 | 11516       | 11119        | 6460               | 5767                | 56                  |
| M51    | Human | 18 | 37159       | 36972        | 10216              | 10216               | 99                  |
| M58    | Human | 22 | 45367       | 45163        | 10216              | 10216               | 99                  |
| M68    | Human | 20 | 45925       | 45642        | 10216              | 10209               | 99                  |
| M73    | NHP   | 14 | 107280      | 105827       | 10216              | 10216               | 99                  |
| M78    | NHP   | 12 | 24353       | 24190        | 10216              | 10216               | 99                  |
| M79    | NHP   | 11 | 35816       | 35449        | 10216              | 10216               | 99                  |
| M83    | NHP   | 12 | 46097       | 45590        | 10216              | 10216               | 99                  |
| M94    | Human | 14 | 215524      | 213371       | 10216              | 10216               | 99                  |
| M96    | Human | 19 | 22424       | 20838        | 8772               | 5768                | 56                  |
| M98    | Human | 15 | 66026       | 65498        | 10216              | 9673                | 94                  |
| M99    | Human | 10 | 93181       | 92822        | 10216              | 10216               | 99                  |
| M100   | Human | 14 | 148291      | 147395       | 10216              | 10216               | 99                  |
| M105   | Human | 17 | 36169       | 35955        | 10216              | 10216               | 99                  |
| M107   | Human | 9  | 21532       | 21417        | 10216              | 10216               | 99                  |
| M123   | Human | 18 | 31236       | 30980        | 10216              | 10136               | 98                  |
| M138   | Human | 15 | 77337       | 76703        | 10216              | 10216               | 99                  |
| M164   | Human | 32 | 33076       | 28899        | 9075               | 8346                | 81                  |
| M210   | NHP   | 12 | 359234      | 358667       | 10216              | 10216               | 99                  |
| M211   | NHP   | 9  | 342819      | 342251       | 10216              | 10216               | 99                  |
| M216   | NHP   | 14 | 387989      | 387305       | 10216              | 8916                | 87                  |
| M217   | NHP   | 11 | 260350      | 259631       | 10211              | 7361                | 71                  |
| M218   | NHP   | -  | 70075       | 69013        | 10216              | 10216               | 99                  |
| M225   | NHP   | -  | 87647       | 87506        | 10216              | 10216               | 99                  |
| M226   | NHP   | -  | 81415       | 81160        | 10216              | 10216               | 99                  |
| RJ143  | NHP   | 10 | 733         | 604          | 8266               | 3442                | 54                  |
| RJ148  | Human | 18 | 17853       | 6546         | 9541               | 9539                | 93                  |
| RJ150  | Human | 18 | 26895       | 25073        | 9855               | 9844                | 96                  |
| RJ151  | NHP   | 9  | 2919        | 2809         | 10170              | 9764                | 97                  |
| RJ153  | NHP   | 9  | 2857        | 2758         | 10172              | 10166               | 99                  |
| RJ157  | Human | 17 | 7531        | 5025         | 9258               | 9256                | 90                  |
| RJ162  | NHP   | 9  | 6276        | 6176         | 10172              | 10168               | 99                  |
| RJ163  | NHP   | 13 | 4210        | 4171         | 10171              | 9859                | 99                  |
| RJ164  | NHP   | 11 | 2563        | 2549         | 9851               | 9403                | 92                  |
| RJ168  | NHP   | 18 | 3202        | 2544         | 9430               | 8804                | 89                  |
| RJ171  | NHP   | 9  | 1603        | 1534         | 10115              | 8014                | 85                  |

---

|       |       |    |      |       |       |      |    |
|-------|-------|----|------|-------|-------|------|----|
| RJ185 | Human | 14 | 3369 | 33555 | 10171 | 9717 | 99 |
|-------|-------|----|------|-------|-------|------|----|

**Table S6.**

Statistics for the sequences generated using the IonTorrent sequencer.

| <b>Sample</b> | <b>Host</b> | <b>Ct</b> | <b>Total Reads</b> | <b>Mapped Reads</b> | <b>Bases Covered &gt;1x</b> | <b>Bases Covered &gt;=10x</b> | <b>% Reference Covered</b> |
|---------------|-------------|-----------|--------------------|---------------------|-----------------------------|-------------------------------|----------------------------|
| 438           | NHP         | 19        | 223937             | 217572              | 9958                        | 9957                          | 97                         |
| 460           | Human       | 16        | 44315              | 41509               | 9541                        | 8718                          | 81                         |
| 465           | Human       | 17        | 207616             | 202108              | 9811                        | 9647                          | 94                         |
| 480           | Human       | 13        | 47989              | 44951               | 9950                        | 9922                          | 96                         |
| 532           | Alouatta    | 8         | 283134             | 277698              | 10234                       | 9948                          | 97                         |
| 1536          | Human       | 11        | 71865              | 67197               | 9951                        | 9721                          | 97                         |
| 1818          | Human       | 19        | 46210              | 42614               | 9273                        | 8824                          | 82                         |
| 2109          | Aloutta     | 7         | 324683             | 315437              | 10120                       | 10005                         | 97                         |
| 2115          | Callithrix  | 11        | 43913              | 40994               | 9950                        | 9467                          | 91                         |
| 3919          | Human       | 14        | 44821              | 39888               | 9735                        | 9139                          | 82                         |
| 4278          | Alouatta    | 11        | 44873              | 41367               | 9931                        | 9667                          | 97                         |
| 4480          | Human       | 19        | 217496             | 210440              | 9951                        | 9950                          | 97                         |



**Table S7.**

Statistics for the sequences generated using the MiSeq sequencer.

| <b>Sample</b> | <b>Host</b> | <b>Ct</b> | <b>Total Reads</b> | <b>Mapped Reads</b> | <b>Bases Covered &gt;1x</b> | <b>Bases Covered &gt;=10x</b> | <b>% Reference Covered</b> |
|---------------|-------------|-----------|--------------------|---------------------|-----------------------------|-------------------------------|----------------------------|
| 8             | NHP         | 12        | 429568             | 1507                | 9774                        | 5307                          | 96                         |
| 11            | NHP         | 13        | 574990             | 3120                | 9995                        | 7754                          | 98                         |

**Table S8.**

Coalescent generalized linear model results. Inclusion = probability that the predictor was included in the model. BF = Bayes factor. cEffect = conditional effect size, which represents the estimate of the coefficient conditional on the predictor being included in the model. Both the mean and the 95% highest posterior density credible interval (95% HPD) of the conditional effect size are reported. YFV(H), YFV(NHP) and CHIKV correspond to the time series in epidemiological datasets A to C described above. \* HPDs could not be computed for CHIKV as the predictor is too infrequently included in the model.

| <b>Predictor</b> | <b>Inclusion</b> | <b>BF</b> | <b>cEffect (95% HPD)</b> |
|------------------|------------------|-----------|--------------------------|
| YFV(H)           | 0.367            | 1.870     | 0.959 (0.623, 1.320)     |
| YFV(NHP)         | 0.633            | 4.812     | 1.081 (0.713, 1.466)     |
| CHIKV            | 0.0003           | 0.0002    | 0.761 (NA, NA)*          |

**Table S9.**

Generalized stepping-stone (GSS) sampling for each of the continuous diffusion models. Models are ordered according to their Bayes Factor (BF) score, calculated against the Brownian diffusion model (homogeneous diffusion).

| <b>Model</b>  | <b>GSS</b> | <b>Bayes Factor</b> |
|---------------|------------|---------------------|
| Homogeneous   | -16648,01  | 0.0                 |
| Lognormal     | -16605,42  | 42.59               |
| <b>Cauchy</b> | -16580,12  | <b>67.89</b>        |

**Movie S1.**

Reconstructed spatiotemporal diffusion of the YFV outbreak in Brazil.

## References

1. T. Garske *et al.*, Yellow Fever in Africa: estimating the burden of disease and impact of mass vaccination from outbreak and serological data. *PLoS Medicine* **11**, e1001638 (2014).
2. C. I. Paules, Fauci, A. S., Yellow Fever - Once Again on the Radar Screen in the Americas. *The New England Journal of Medicine*, 1397-1399 (2017).
3. M. Theiler, Smith, H. H., The effect of prolonged cultivation in vitro upon the pathogenicity of yellow fever virus. *J. Exp. Med.* **65**, 767-786 (1937).
4. F. M. Shearer *et al.*, Global yellow fever vaccination coverage from 1970 to 2016: an adjusted retrospective analysis. *The Lancet Infectious Diseases* **17**, 1209-1217 (2017).
5. M. R. Nunes *et al.*, Genomic and phylogenetic characterization of Brazilian yellow fever virus strains. *Journal of Virology* **86**, 13263-13271 (2012).
6. J. P. Mutebi, H. Wang, L. Li, J. E. Bryant, A. D. Barrett, Phylogenetic and evolutionary relationships among yellow fever virus isolates in Africa. *Journal of Virology* **75**, 6999-7008 (2001).
7. J. J. von Lindern *et al.*, Genome analysis and phylogenetic relationships between east, central and west African isolates of Yellow fever virus. *The Journal of General Virology* **87**, 895-907 (2006).
8. E. Wang *et al.*, Genetic variation in yellow fever virus: duplication in the 3' noncoding region of strains from Africa. *Virology* **225**, 274-281 (1996).
9. G. J. Chang, B. C. Cropp, R. M. Kinney, D. W. Trent, D. J. Gubler, Nucleotide sequence variation of the envelope protein gene identifies two distinct genotypes of yellow fever virus. *Journal of Virology* **69**, 5773-5780 (1995).
10. M. N. O. Segura, Castro, F. C. C., *Atlas de Culicídeos na Amazônia Brasileira*. (Instituto Evandro Chagas Press, 2007), vol. 167.
11. C. Cardoso Jda *et al.*, Yellow fever virus in *Haemagogus leucocelaenus* and *Aedes serratus* mosquitoes, southern Brazil, 2008. *Emerging Infectious Diseases* **16**, 1918-1924 (2010).
12. A. A. Grobbelaar *et al.*, Resurgence of Yellow Fever in Angola, 2015-2016. *Emerging Infectious Diseases* **22**, 1854-1855 (2016).
13. M. U. Kraemer *et al.*, Spread of yellow fever virus outbreak in Angola and the Democratic Republic of the Congo 2015-16: a modelling study. *The Lancet Infectious Diseases* **17**, 330-338 (2017).
14. O. Franco, História da Febre Amarela no Brasil. *Ministério da Saúde, DNERU, Rio de Janeiro*, 208 (1969).
15. R. A. G. B. Consoli, Lourenço-de-Oliveira, R., *Principais mosquitos de importância sanitária no Brasil [online]*. FioCruz (Editora FIOCRUZ, Rio de Janeiro, 1994).
16. J. Vainio, "Yellow fever," *World Health Organization* (1998).
17. M. U. Kraemer *et al.*, The global distribution of the arbovirus vectors *Aedes aegypti* and *Ae. albopictus*. *eLife* **4**, e08347 (2015).
18. Secretaria de Vigilância em Saúde, Ministério da Saúde, Emergência epidemiológica de febre amarela no Brasil, no período de Dezembro de 2016 a Julho de 2017 ([http://portalarquivos2.saude.gov.br/images/pdf/2017/setembro/06/2017\\_027.pdf](http://portalarquivos2.saude.gov.br/images/pdf/2017/setembro/06/2017_027.pdf)) Boletim Epidemiológico no. **48** (2017).
19. P. F. Vasconcelos *et al.*, Epidemic of jungle yellow fever in Brazil, 2000: implications of climatic alterations in disease spread. *Journal of Medical Virology* **65**, 598-604 (2001).

20. PAHO/WHO, "Epidemiological Update Yellow Fever [http://www.paho.org/hq/index.php?option=com\\_topics&view=read&layout=article&id=2194&Itemid=40784&lang=en](http://www.paho.org/hq/index.php?option=com_topics&view=read&layout=article&id=2194&Itemid=40784&lang=en) 16 Feb 2018," *PAHO/WHO Yellow Fever* (2018).
21. F. M. Shearer *et al.*, Existing and potential infection risk zones of yellow fever worldwide: a modelling analysis. *The Lancet. Global health* **6**, e270-e278 (2018).
22. Instituto Evandro Chagas. <http://www.iec.gov.br/portal/> (2018).
23. R. Lourenco-de-Oliveira, M. Vazeille, A. M. de Filippis, A. B. Failloux, Aedes aegypti in Brazil: genetically differentiated populations with high susceptibility to dengue and yellow fever viruses. *Transactions of the Royal Society of Tropical Medicine and Hygiene* **98**, 43-54 (2004).
24. D. Couto-Lima *et al.*, Potential risk of re-emergence of urban transmission of Yellow Fever virus in Brazil facilitated by competent Aedes populations. *Scientific Reports* **7**, 4848 (2017).
25. N. R. Faria, Lourenco, J., Cerqueira, E. M., Lima, M. M., Pybus, O. G., Alcantara, L. C. J., Epidemiology of Chikungunya Virus in Bahia, Brazil, 2014-2015. *PLoS Currents Outbreaks* **1**, (2016).
26. N. R. Faria *et al.*, Genomic and epidemiological characterisation of a dengue virus outbreak among blood donors in Brazil. *Scientific Reports* **7**, 15216 (2017).
27. S. H. Tuboi, Z. G. Costa, P. F. da Costa Vasconcelos, D. Hatch, Clinical and epidemiological characteristics of yellow fever in Brazil: analysis of reported cases 1998-2002. *Transactions of the Royal Society of Tropical Medicine and Hygiene* **101**, 169-175 (2007).
28. PAHO, "Outbreak of Yellow Fever in Paraguay" (Washington, 2009).
29. A. Nasidi *et al.*, Urban yellow fever epidemic in western Nigeria, 1987. *Transactions of the Royal Society of Tropical Medicine and Hygiene* **83**, 401-406 (1989).
30. S. D. Thiberville *et al.*, Chikungunya fever: a clinical and virological investigation of outpatients on Reunion Island, South-West Indian Ocean. *PLoS Negl Trop Dis* **7**, e2004 (2013).
31. M. Ribeiro, C. M. Antunes, [Yellow fever: study of an outbreak]. *Revista da Sociedade Brasileira de Medicina Tropical* **42**, 523-531 (2009).
32. G. Quick J., N. D., Pullan, S. T., Claro, I. M., Smith, A. D., Gangavarapu, k., Oliveira, G., Robles-Sikisaka, R., Rogers, T. F., Beutler, N. A., Burton, D. R., Lewis-Ximenez, L. L., de Jesus, J. G., Giovanetti, M., Hill, S., Black, A., Bedford, T., Carroll, M. W., Nunes, M., Alcantara, L. C., Sabino, E. C., Baylis, S. A., Faria, N. R., Loose, M., Simpson, J. T., Pybus, O. G., Andersen, K. G., Loman, N. J., Multiplex PCR method for MinION and Illumina sequencing of Zika and other virus genomes directly from clinical samples. *Nature Protocols* **12**, 1261-1276 (2017).
33. M. C. Bonaldo *et al.*, Genome analysis of yellow fever virus of the ongoing outbreak in Brazil reveals polymorphisms. *Memorias do Instituto Oswaldo Cruz* **112**, 447-451 (2017).
34. A. Moreira-Soto, Torres, M. C., Lima de Mendonça, M. C., Mares-Guia, M. A., Dos Santos Rodrigues, C. D., Fabri, A. A., Dos Santos, C. C., Machado Araújo, E. S., Fischer, C., Ribeiro Nogueira, R. M., Drosten, C., Sequeira P. C., Drexler, J. .F, Bispo de Filippis A. M., Evidence for multiple sylvatic transmission cycles during the 2016-2017 yellow fever virus outbreak, Brazil. *Clin Microbiol Infect.* S1198-743X(18)30144-7 (2018).
35. Secretaria de Vigilância em Saúde, Ministério da Saúde, Reemergência da Febre Amarela Silvestre no Brasil, 2014/2015: situação epidemiológica e a importância da vacinação preventiva e da vigilância intensificada no período sazonal.

- (<http://portalarquivos2.saude.gov.br/images/pdf/2015/outubro/19/2015-032---FA-ok.pdf>) *Boletim Epidemiológico* **46**, (2015).
36. P. F. Vasconcelos *et al.*, Genetic divergence and dispersal of yellow fever virus, Brazil. *Emerging Infectious Diseases* **10**, 1578-1584 (2004).
  37. F. P. Camara, A. L. Gomes, L. M. Carvalho, L. G. Castello, Dynamic behavior of sylvatic yellow fever in Brazil (1954-2008). *Revista da Sociedade Brasileira de Medicina Tropical* **44**, 297-299 (2011).
  38. P. F. Vasconcelos *et al.*, Inadequate management of natural ecosystem in the Brazilian Amazon region results in the emergence and reemergence of arboviruses. *Cadernos de Saúde Pública* **17 Suppl**, 155-164 (2001).
  39. G. Dudas *et al.*, Virus genomes reveal factors that spread and sustained the Ebola epidemic. *Nature* **544**, 309-315 (2017).
  40. M. S. Gill, P. Lemey, S. N. Bennett, R. Biek, M. A. Suchard, Understanding Past Population Dynamics: Bayesian Coalescent-Based Modeling with Covariates. *Systematic Biology*, (2016).
  41. T. G. Vaughan, D. Kuhnert, A. Poppinga, D. Welch, A. J. Drummond, Efficient Bayesian inference under the structured coalescent. *Bioinformatics* **30**, 2272-2279 (2014).
  42. G. Dudas, Carvalho, L. M., Rambaut A., Bedford, T., MERS-CoV spillover at the camel-human interface. *eLife* **31257.001** (2018).
  43. O. G. Pybus *et al.*, Unifying the spatial epidemiology and molecular evolution of emerging epidemics. *Proceedings of the National Academy of Sciences of the United States of America* **109**, 15066-15071 (2012).
  44. P. Lemey, A. Rambaut, J. J. Welch, M. A. Suchard, Phylogeography takes a relaxed random walk in continuous space and time. *Molecular Biology and Evolution* **27**, 1877-1885 (2010).
  45. L. Jung, I. Mourthe, C. E. Grelle, K. B. Strier, J. P. Boubli, Effects of Local Habitat Variation on the Behavioral Ecology of Two Sympatric Groups of Brown Howler Monkey (*Alouatta clamitans*). *PloS One* **10**, e0129789 (2015).
  46. E. Flacio, L. Engeler, M. Tonolla, P. Muller, Spread and establishment of *Aedes albopictus* in southern Switzerland between 2003 and 2014: an analysis of oviposition data and weather conditions. *Parasites & Vectors* **9**, 304 (2016).
  47. A. Estrada *et al.*, Impending extinction crisis of the world's primates: Why primates matter. *Sci Adv* **3**, e1600946 (2017).
  48. R. A. Nascimento, Montano, R. A. M., An assessment of illegal capuchin monkey trade in Bahia State, Brazil. *Neotropical Biology and Conservation* **8**, 79-87 (2013).
  49. A. J. Auguste *et al.*, Enzootic transmission of yellow fever virus, Venezuela. *Emerging Infectious Diseases* **21**, 99-102 (2015).
  50. P. R. Stephens *et al.*, Global Mammal Parasite Database version 2.0. *Ecology* **98**, 1476 (2017).
  51. B. W. Johnson *et al.*, Vector competence of Brazilian *Aedes aegypti* and *Ae. albopictus* for a Brazilian yellow fever virus isolate. *Transactions of the Royal Society of Tropical Medicine and Hygiene* **96**, 611-613 (2002).
  52. R. Lourenco de Oliveira, M. Vazeille, A. M. de Filippis, A. B. Failloux, Large genetic differentiation and low variation in vector competence for dengue and yellow fever viruses of *Aedes albopictus* from Brazil, the United States, and the Cayman Islands. *The American Journal of Tropical Medicine and Hygiene* **69**, 105-114 (2003).
  53. F. Soper, Penna, E., Serafim, J., Frobisher, M., Pinheiro, J., Yellow fever without *Aedes aegypti*. Study of a rural epidemic in the Valle do Chanaan, Espirito Santo, Brazil, 1932. *Am J Hyg* **18**, 555-587 (1933).

54. M. Theiler, H. H. Smith, The Use of Yellow Fever Virus Modified by in Vitro Cultivation for Human Immunization. *The Journal of Experimental Medicine* **65**, 787-800 (1937).
55. D. J. Gubler, Dengue, Urbanization and Globalization: the Unholy Trinity of the 21st Century. *Tropical Medicine and Health* **39**, 3-11 (2011).
56. P. Kotsakiozi *et al.*, Tracking the return of *Aedes aegypti* to Brazil, the major vector of the dengue, chikungunya and Zika viruses. *PLoS Negl Trop Dis* **11**, e0005653 (2017).
57. B. Mondet *et al.*, Isolation of yellow fever virus from nulliparous *Haemagogus* (*Haemagogus*) *janthinomys* in eastern Amazonia. *Vector Borne and Zoonotic Diseases* **2**, 47-50 (2002).
58. P. F. Vasconcelos [Yellow Fever]. *Revista da Sociedade Brasileira de Medicina Tropical* **36**, 275-293 (2003).
59. P. F. Vasconcelos *et al.*, Isolations of yellow fever virus from *Haemagogus leucocelaenus* in Rio Grande do Sul State, Brazil. *Transactions of the Royal Society of Tropical Medicine and Hygiene* **97**, 60-62 (2003).
60. P. F. Vasconcelos, Yellow fever in Brazil: thoughts and hypotheses on the emergence in previously free areas. *Revista de Saúde Pública* **44**, 1144-1149 (2010).
61. K. R. Cavalcante, P. L. Tauil, Epidemiological characteristics of yellow fever in Brazil, 2000-2012. *Epidemiol Serv Saúde* **25**, 11-20 (2016).
62. J. Vainio, Cutts, F., "Yellow fever" *WHO/EPI/GEN/98.11* (World Health Organization, Geneva, 1998).
63. World Health Organization - Emergencies preparedness, response [online]. Trends over time (<http://www.who.int/csr/disease/yellowfev/trends/en/>, 2018).
64. A. A. Sall *et al.*, Yellow fever virus exhibits slower evolutionary dynamics than dengue virus. *Journal of Virology* **84**, 765-772 (2010).
65. J. E. Bryant, E. C. Holmes, A. D. Barrett, Out of Africa: a molecular perspective on the introduction of yellow fever virus into the Americas. *PLoS Pathogens* **3**, e75 (2007).
66. C. L. B. Gadia *et al.*, Identification of pathogens for differential diagnosis of fever with jaundice in the Central African Republic: a retrospective assessment, 2008-2010. *BMC Infectious Diseases* **17**, 735 (2017).
67. P. Van der Stuyft *et al.*, Urbanisation of yellow fever in Santa Cruz, Bolivia. *Lancet* **353**, 1558-1562 (1999).
68. Secretaria de Estado de Saúde de Minas Gerais, Manejo Clínico Febre Amarela (Belo Horizonte, Minas Gerais, Brazil, 2017).
69. I. B. Rabe *et al.*, Interim Guidance for Interpretation of Zika Virus Antibody Test Results. *MMWR* **65**, 543-546 (2016).
70. C. T. Lloyd, A. Sorichetta, A. J. Tatem, High resolution global gridded data for use in population studies. *Scientific Data* **4**, 170001 (2017).
71. Secretaria de Vigilância em Saúde, Ministério da Saúde, Monitoramento dos casos de dengue, febre de chikungunya e febre pelo vírus Zika até a Semana Epidemiológica 5 de 2018. *Boletim Epidemiológico* **49** (2018).
72. Secretaria de Estado de Saúde de Minas Gerais, "Manual Técnico de Atenção à Saúde e resposta aos casos de infecção pelo vírus Zika em gestantes, fetos e recém-nascidos (v1)" (Belo Horizonte, Minas Gerais, Brazil, 2016).
73. F. M. Shearer, Longbottom, J., Browne, A. J., Pigott, D. M., Brady, O. J., Kraemer, M. U., Marinho, F., Yactayo, S., de Araujo, V. E. M., Nobrega, A. A., Fullman, N., Ray, S. E., Mosser, J. F., Stanaway, J. D., Lim, S. S., Reiner Jr, R. C., Moyes, C. L., Hay, S. I., Existing and potential infection risk zones of yellow fever worldwide: a modelling analysis. *The Lancet Global Health* **6**, 270-328 (2018).



74. A. Sorichetta *et al.*, High-resolution gridded population datasets for Latin America and the Caribbean in 2010, 2015, and 2020. *Scientific Data* **2**, 150045 (2015).
75. D. J. Weiss *et al.*, An effective approach for gap-filling continental scale remotely sensed time-series. *ISPRS J Photogramm Remote Sens* **98**, 106-118 (2014).
76. A. Hamlet *et al.*, The seasonal influence of climate and environment on yellow fever transmission across Africa. *PLoS Negl Trop Dis* **12**, e0006284 (2018).
77. R Core Team (2013) R: A language and environment for statistical computing. R Foundation for Statistical Computing, Vienna, Austria, URL: <http://R-project.org/>.
78. C. Domingo *et al.*, Advanced yellow fever virus genome detection in point-of-care facilities and reference laboratories. *Journal of Clinical Microbiology* **50**, 4054-4060 (2012).
79. N. R. Faria *et al.*, Establishment and cryptic transmission of Zika virus in Brazil and the Americas. *Nature* **546**, 406-410 (2017).
80. M. Kearse *et al.*, Geneious Basic: an integrated and extendable desktop software platform for the organization and analysis of sequence data. *Bioinformatics* **28**, 1647-1649 (2012).
81. H. Li, R. Durbin, Fast and accurate short read alignment with Burrows-Wheeler transform. *Bioinformatics* **25**, 1754-1760 (2009).
82. A. McKenna *et al.*, The Genome Analysis Toolkit: a MapReduce framework for analyzing next-generation DNA sequencing data. *Genome Res* **20**, 1297-1303 (2010).
83. D. Darriba, G. L. Taboada, R. Doallo, D. Posada, jModelTest 2: more models, new heuristics and parallel computing. *Nature Methods* **9**, 772 (2012).
84. A. Stamatakis, RAxML version 8: a tool for phylogenetic analysis and post-analysis of large phylogenies. *Bioinformatics* **30**, 1312-1313 (2014).
85. S. F. Altschul, W. Gish, W. Miller, E. W. Myers, D. J. Lipman, Basic local alignment search tool. *Journal of Molecular Biology* **215**, 403-410 (1990).
86. N. A. O'Leary *et al.*, Reference sequence (RefSeq) database at NCBI: current status, taxonomic expansion, and functional annotation. *Nucleic Acids Research* **44**, D733-745 (2016).
87. C. M. Rice *et al.*, Nucleotide sequence of yellow fever virus: implications for flavivirus gene expression and evolution. *Science* **229**, 726-733 (1985).
88. N. R. Faria *et al.*, Zika virus in the Americas: Early epidemiological and genetic findings. *Science* **352**, 345-349 (2016).
89. M. R. Nunes *et al.*, Phylogeography of dengue virus serotype 4, Brazil, 2010-2011. *Emerging Infectious Diseases* **18**, 1858-1864 (2012).
90. D. A. Benson, I. Karsch-Mizrachi, D. J. Lipman, J. Ostell, D. L. Wheeler, GenBank: update. *Nucleic Acids Research* **32**, D23-26 (2004).
91. K. Katoh, D. M. Standley, MAFFT multiple sequence alignment software version 7: improvements in performance and usability. *Molecular Biology and Evolution* **30**, 772-780 (2013).
92. A. Rambaut, Lam, T. T., Fagundes de Carvalho, L., Pybus, O. G., Exploring the temporal structure of heterochronous sequences using TempEst (formerly Path-O-Gen). *Virus Evolution* **2**, (2016).
93. D. H. Huson, D. Bryant, Application of phylogenetic networks in evolutionary studies. *Molecular Biology and Evolution* **23**, 254-267 (2006).
94. D. P. Martin, B. Murrell, M. Golden, A. Khoosal, B. Muhire, RDP4: Detection and analysis of recombination patterns in virus genomes. *Virus Evolution* **1**, vev003 (2015).
95. A. Moreira-Soto *et al.*, Evidence for multiple sylvatic transmission cycles during the 2016-2017 yellow fever virus outbreak, Brazil. *Clinical Microbiology and Infection* S1198-743C(18)30144-7 (2018).

96. A. J. Drummond, A. Rambaut, BEAST: Bayesian evolutionary analysis by sampling trees. *BMC Evolutionary Biology* **7**, 214 (2007).
97. A. J. Drummond, S. Y. Ho, M. J. Phillips, A. Rambaut, Relaxed phylogenetics and dating with confidence. *PLoS Biology* **4**, e88 (2006).
98. E. C. Holmes, G. Dudas, A. Rambaut, K. G. Andersen, The evolution of Ebola virus: Insights from the 2013-2016 epidemic. *Nature* **538**, 193-200 (2016).
99. M. S. Gill *et al.*, Improving Bayesian population dynamics inference: a coalescent-based model for multiple loci. *Molecular Biology and Evolution* **30**, 713-724 (2013).
100. R. Bouckaert *et al.*, BEAST 2: a software platform for Bayesian evolutionary analysis. *PLoS Computational Biology* **10**, e1003537 (2014).
101. G. Baele, P. Lemey, M. A. Suchard, Genealogical Working Distributions for Bayesian Model Testing with Phylogenetic Uncertainty. *Systematic Biology* **65**, 250-264 (2016).
102. A. J. Drummond, M. A. Suchard, D. Xie, A. Rambaut, Bayesian phylogenetics with BEAUti and the BEAST 1.7. *Molecular Biology and Evolution* **29**, 1969-1973 (2012).
103. D. L. Ayres *et al.*, BEAGLE: an application programming interface and high-performance computing library for statistical phylogenetics. *Systematic Biology* **61**, 170-173 (2012).
104. S. Dellicour, Rose, R., Pybus, O. G., Explaining the geographic spread of emerging epidemics: a framework comparing viral phylogenies and environmental landscape data. *BMC Bioinformatics* **17**:82 (2016).
105. S. Dellicour, R. Rose, N. R. Faria, P. Lemey, O. G. Pybus, SERAPHIM: studying environmental rasters and phylogenetically informed movements. *Bioinformatics* **32**, 3204-3206 (2016).
106. S. Dellicour *et al.*, Using Viral Gene Sequences to Compare and Explain the Heterogeneous Spatial Dynamics of Virus Epidemics. *Molecular Biology and Evolution* **34**, 2563-2571 (2017).
107. Ministério da Saúde, "Manual de Vigilância Epidemiologia de Febre Amarela" ([http://bvsms.saude.gov.br/bvs/publicacoes/manual\\_vigilancia\\_epid\\_febre\\_amarela.pdf](http://bvsms.saude.gov.br/bvs/publicacoes/manual_vigilancia_epid_febre_amarela.pdf)) (Brasília, 2004).
108. Secretaria de Vigilância em Saúde, Ministério da Saúde, "Monitoramento do Período Sazonal da Febre Amarela Brasil – 2017/2018" (<http://portalarquivos2.saude.gov.br/images/pdf/2018/maio/18/Informe-FA-26.pdf>) Informe 26 (Brasília, 2018).
109. M. M. Gomez *et al.*, Genomic and structural features of the yellow fever virus from the 2016-2017 Brazilian outbreak. *The Journal of General Virology* **99**, 536-548 (2018).
